# Supplementary material for: Synthesis of helically π-stacked poly(quinolylene-2,3-methylene)s with anthracene derivatives at the chain end: intramolecular energy transfer based on the π-stacked architecture
Source: Royal Society of Chemistry journal article supplement (doi:10.1039/d2py01179d), 2022-11-14
Supplement: d2py01179d1.pdf [file d2py01179d1.pdf]

**Electronic supplementary information for**

**Synthesis of Helically  $\pi$ -Stacked Poly(quinolylene-2,3-methylene)s with Anthracene Derivatives at the Chain-End: Intramolecular Energy Transfer Based on the  $\pi$ -Stacked Architecture**

*Naoya Kanbayashi,\* Miho Nishio, Taka-aki Okamura and Kiyotaka Onitsuka\**

Department of Macromolecular Science Graduate School of Science, Osaka University, Toyonaka,  
Osaka 560-0043, Japan

**1. Experimental Section**

**1.1. General**

**1.2. Materials**

**1.3. Synthesis of Model Compounds**

**2-1. UV and CD Spectra**

**2-2. Determination of Energy Transfer efficiency**

**3. MS Spectrum**

**4. References**

**5. NMR Analysis**

**6. SEC Analysis**

## 1. Experimental Section

### General.

All reactions were carried out under an Ar atmosphere whereas the work-up was performed in air. NMR spectra were recorded on JEOL JNM-ECS400 and JEOL JNM-ECA500 spectrometers. In  $^1\text{H}$  and  $^{13}\text{C}$  NMR,  $\text{SiMe}_4$  was used as an internal standard, and an external 85%  $\text{H}_3\text{PO}_4$  reference was used for  $^{31}\text{P}$  NMR. The number-average molar mass ( $M_n$ ) and the molar mass dispersity ( $M_w/M_n$ ) of the polymers were determined at 40 °C by size exclusion chromatography (SEC) using a SHIMADZU LC-10AS, SPD-10AD UV-vis detector, and CTO-10A column oven equipped with three SEC columns SHODEX GPC KF-805L using THF as an eluent, and calibrated against standard PS samples. CD spectra were obtained by JASCO J-720WO. UV-vis spectra were obtained by SHIMADZU UV 3100PC. Fluorescence spectra were measured by HORIBA FluoroMax-4. Absolute quantum yield was measured by HAMAMATSU C9920-02. ESI-HRMS measurements were carried out on Thermo Fisher Scientific LTQ-Orbitrap XL.

### Materials

All solvents used for reactions were passed through purification columns just before use. Other chemicals reagents which are commercially available were used without further purification. Monomer **1** was prepared as reported previously.<sup>1-2</sup>

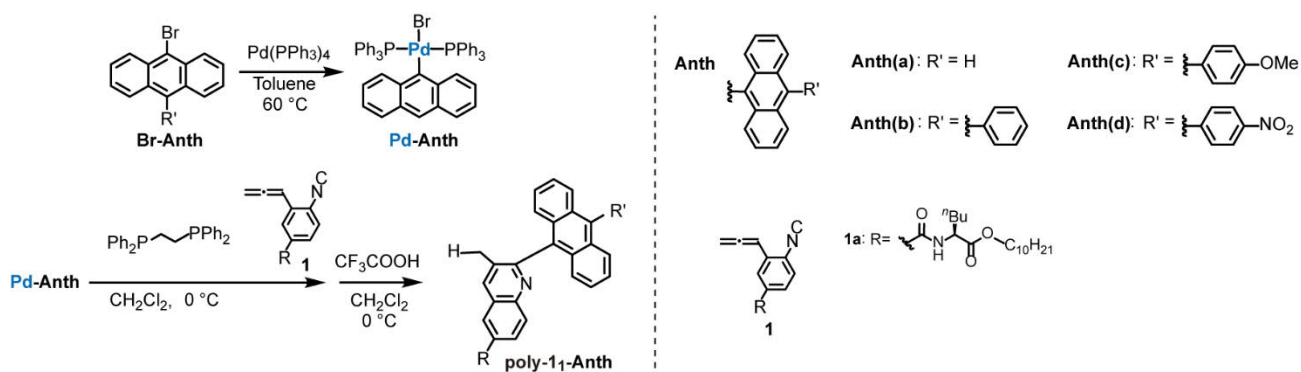

### Standard Method of model compound (poly-1a<sub>1</sub>-Anth(a-d)).

A solution of  $\text{Pd(PPh}_3)_4$  (0.3 mmol, 1.0 eq.) and **Br-Anth** (0.3 mmol, 1.0 eq.) in toluene (3.0 mL) was stirred at 60 °C for overnight. The reaction mixture was concentrated under reduced pressure. The residue and 1,3-bis(diphenylphosphino)ethane (0.6 mmol, 2.0 eq.) were dissolved with  $\text{CH}_2\text{Cl}_2$  (15.0 mL) stirred for 5 min at 0 °C. After then, the mixture was added **1a** (0.2 mmol, 0.7 eq.) in  $\text{CH}_2\text{Cl}_2$  (2.0 mL) at 0 °C. The mixture was stirred at 0 °C. After stirring for 30 min, the reaction mixture was concentrated under reduced pressure.  $\text{NaBH}_4$  (3.0 mmol, 10.0 eq.) was added, dissolved with THF (8.0 mL) and stirred at 0 °C for 30 min. The reaction mixture was neutralized with sat  $\text{NaHCO}_3$  aq, and extracted with  $\text{AcOEt}$ . The organic layer was dried over with anhydrous  $\text{Na}_2\text{SO}_4$  and concentrated under reduced pressure. The residue was purified by silica gel column chromatography ( $n$ -hexane/ $\text{AcOEt}$  = 10/1).

### Synthesis of poly-1a<sub>1</sub>-Anth(a)

This compound was prepared from **Br-Anth(a)** (24.8 mg, 0.10 mmol) to give a yellow solid (31.8 mg, 52%). <sup>1</sup>H NMR (400 MHz, CDCl<sub>3</sub>, 25 °C) δ 8.59 (s, 1H, Ar), 8.46 (d, 1H, *J* = 1.7 Hz, Ar), 8.28 (s, 1H, Ar), 8.22 (d, 1H, *J* = 8.8 Hz, Ar), 8.09 (d, 3H, *J* = 8.7 Hz, Ar), 7.50-7.45 (m, 2H, Ar), 7.34-7.31 (m, 4H, Ar), 6.90 (d, 1H, *J* = 7.7 Hz, *NH*), 4.92 (q, 1H, *J* = 6.1 Hz, *CHCH*<sub>2</sub>), 4.25-4.20 (m, 2H, *OCH*<sub>2</sub>), 2.07 (s, 3H, Ar-*CH*<sub>3</sub>), 2.05 (m, 1H, *CHCH*<sub>2</sub>(CH<sub>2</sub>)<sub>2</sub>CH<sub>3</sub>), 1.90 (m, 1H, *CHCH*<sub>2</sub>(CH<sub>2</sub>)<sub>2</sub>CH<sub>3</sub>), 1.70 (m, 2H, *OCH*<sub>2</sub>CH<sub>2</sub>(CH<sub>2</sub>)<sub>7</sub>CH<sub>3</sub>), 1.42-1.20 (m, 18H, *OCH*<sub>2</sub>CH<sub>2</sub>(CH<sub>2</sub>)<sub>7</sub>CH<sub>3</sub>, *CHCH*<sub>2</sub>(CH<sub>2</sub>)<sub>2</sub>CH<sub>3</sub>), 0.94 (t, 3H, *J* = 7.1 Hz, *CH*(CH<sub>2</sub>)<sub>3</sub>CH<sub>3</sub>), 0.88 (t, 3H, *J* = 7.0 Hz, *O*(CH<sub>2</sub>)<sub>9</sub>CH<sub>3</sub>). HRMS (ESI): Calcd for C<sub>41</sub>H<sub>48</sub>N<sub>2</sub>O<sub>3</sub> ([M+Na]<sup>+</sup>): *m/z* 639.3557, Found: *m/z* 639.3555.

### Synthesis of poly-1a<sub>1</sub>-Anth(b)

This compound was prepared from **Br-Anth(b)** (102.3 mg, 0.30 mmol) to give a yellow solid (57.7 mg, 28%). <sup>1</sup>H NMR (400 MHz, CDCl<sub>3</sub>, 25 °C) δ 8.48 (d, 1H, *J* = 2.0 Hz, Ar), 8.31 (s, 1H, Ar), 8.24 (d, 1H, *J* = 8.7 Hz, Ar), 8.10 (dd, 1H, *J* = 8.9, 1.8 Hz, Ar), 7.74-7.71 (m, 2H, Ar), 7.65-7.53 (m, 4H, Ar), 7.43-7.31 (m, 7H, Ar), 6.91 (d, 1H, *J* = 7.4 Hz, *NH*), 4.93 (q, 1H, *J* = 6.1 Hz, *CHCH*<sub>2</sub>), 4.25-4.20 (m, 2H, *OCH*<sub>2</sub>), 2.18 (s, 3H, Ar-*CH*<sub>3</sub>), 2.05 (m, 1H, *CHCH*<sub>2</sub>(CH<sub>2</sub>)<sub>2</sub>CH<sub>3</sub>), 1.90 (m, 1H, *CHCH*<sub>2</sub>(CH<sub>2</sub>)<sub>2</sub>CH<sub>3</sub>), 1.71 (m, 2H, *OCH*<sub>2</sub>CH<sub>2</sub>(CH<sub>2</sub>)<sub>7</sub>CH<sub>3</sub>), 1.44-1.20 (m, 18H, *OCH*<sub>2</sub>CH<sub>2</sub>(CH<sub>2</sub>)<sub>7</sub>CH<sub>3</sub>, *CHCH*<sub>2</sub>(CH<sub>2</sub>)<sub>2</sub>CH<sub>3</sub>), 0.95 (t, 3H, *J* = 7.1 Hz, *O*(CH<sub>2</sub>)<sub>9</sub>CH<sub>3</sub>), 0.89 (t, 3H, *J* = 7.0 Hz, *CH*(CH<sub>2</sub>)<sub>3</sub>CH<sub>3</sub>). HRMS (ESI): Calcd for C<sub>47</sub>H<sub>52</sub>N<sub>2</sub>O<sub>3</sub> ([M+Na]<sup>+</sup>): *m/z* 715.3870, Found: *m/z* 715.3868.

### Synthesis of poly-1a<sub>1</sub>-Anth(c)

This compound was prepared from **Br-Anth(c)** (113.1 mg, 0.30 mmol) to give a yellow solid (79.3 mg, 32%). <sup>1</sup>H NMR (400 MHz, CDCl<sub>3</sub>, 25 °C) δ 8.48 (s, 1H, Ar), 8.31 (s, 1H, Ar), 8.24 (d, 1H, *J* = 8.5 Hz, Ar), 8.10 (d, 1H, *J* = 8.6 Hz, Ar), 7.80 (m, 2H, Ar), 7.47 (m, 2H, Ar), 7.35-7.31 (m, 7H, Ar), 7.16 (m, 2H, Ar), 7.04 (m, 1H, Ar), 6.91 (d, 1H, *J* = 7.8 Hz, *NH*), 4.92 (q, 1H, *J* = 6.1 Hz, *CHCH*<sub>2</sub>), 4.24-4.22 (m, 2H, *OCH*<sub>2</sub>), 3.98 (s, 3H, *OCH*<sub>3</sub>), 2.17 (s, 3H, Ar-*CH*<sub>3</sub>), 2.07 (m, 1H, *CHCH*<sub>2</sub>(CH<sub>2</sub>)<sub>2</sub>CH<sub>3</sub>), 1.90 (m, 1H, *CHCH*<sub>2</sub>(CH<sub>2</sub>)<sub>2</sub>CH<sub>3</sub>), 1.71 (m, 2H, *OCH*<sub>2</sub>CH<sub>2</sub>(CH<sub>2</sub>)<sub>7</sub>CH<sub>3</sub>), 1.41-1.25 (m, 18H, *OCH*<sub>2</sub>CH<sub>2</sub>(CH<sub>2</sub>)<sub>7</sub>CH<sub>3</sub>, *CHCH*<sub>2</sub>(CH<sub>2</sub>)<sub>2</sub>CH<sub>3</sub>), 0.95 (t, 3H, *J* = 7.1 Hz, *O*(CH<sub>2</sub>)<sub>9</sub>CH<sub>3</sub>), 0.89 (t, 3H, *J* = 7.0 Hz, *CH*(CH<sub>2</sub>)<sub>3</sub>CH<sub>3</sub>). HRMS (ESI): Calcd for C<sub>48</sub>H<sub>54</sub>N<sub>2</sub>O<sub>4</sub> ([M+Na]<sup>+</sup>): *m/z* 745.3976, Found: *m/z* 745.3973.

### Synthesis of poly-1a<sub>1</sub>-Anth(d)

This compound was prepared from **Br-Anth(d)** (75.6 mg, 0.20 mmol) to give an orange solid (36.3 mg, 26%). <sup>1</sup>H NMR (400 MHz, CDCl<sub>3</sub>, 25 °C) δ 8.53-8.49 (m, 3H, Ar), 8.33 (s, 1H, Ar), 8.24 (d, 1H, *J* = 8.1 Hz, Ar), 8.11 (d, 1H, *J* = 8.6 Hz, Ar), 7.77 (d, 1H, *J* = 8.0 Hz, Ar), 7.64-7.58 (m, 3H, Ar), 7.39-7.37 (m, 5H, Ar), 6.92 (d, 1H, *J* = 7.6 Hz, *NH*), 4.93 (q, 1H, *J* = 6.1 Hz, *CHCH*<sub>2</sub>), 4.32-4.20 (m, 2H, *OCH*<sub>2</sub>), 2.18 (s, 3H, Ar-*CH*<sub>3</sub>), 2.04 (m, 1H, *CHCH*<sub>2</sub>(CH<sub>2</sub>)<sub>2</sub>CH<sub>3</sub>), 1.90 (m, 1H, *CHCH*<sub>2</sub>(CH<sub>2</sub>)<sub>2</sub>CH<sub>3</sub>), 1.71 (m, 2H, *OCH*<sub>2</sub>CH<sub>2</sub>(CH<sub>2</sub>)<sub>7</sub>CH<sub>3</sub>), 1.45-1.28 (m, 18H, *OCH*<sub>2</sub>CH<sub>2</sub>(CH<sub>2</sub>)<sub>7</sub>CH<sub>3</sub>, *CHCH*<sub>2</sub>(CH<sub>2</sub>)<sub>2</sub>CH<sub>3</sub>), 0.95 (t, 3H, *J* = 7.1 Hz, *O*(CH<sub>2</sub>)<sub>9</sub>CH<sub>3</sub>), 0.91 (t, 3H, *J* = 7.0 Hz, *CH*(CH<sub>2</sub>)<sub>3</sub>CH<sub>3</sub>). HRMS (ESI): Calcd for C<sub>47</sub>H<sub>51</sub>N<sub>3</sub>O<sub>5</sub> ([M+Na]<sup>+</sup>): *m/z* 760.3721, Found: *m/z* 760.3719.

## 2. CD, UV, and emission spectra

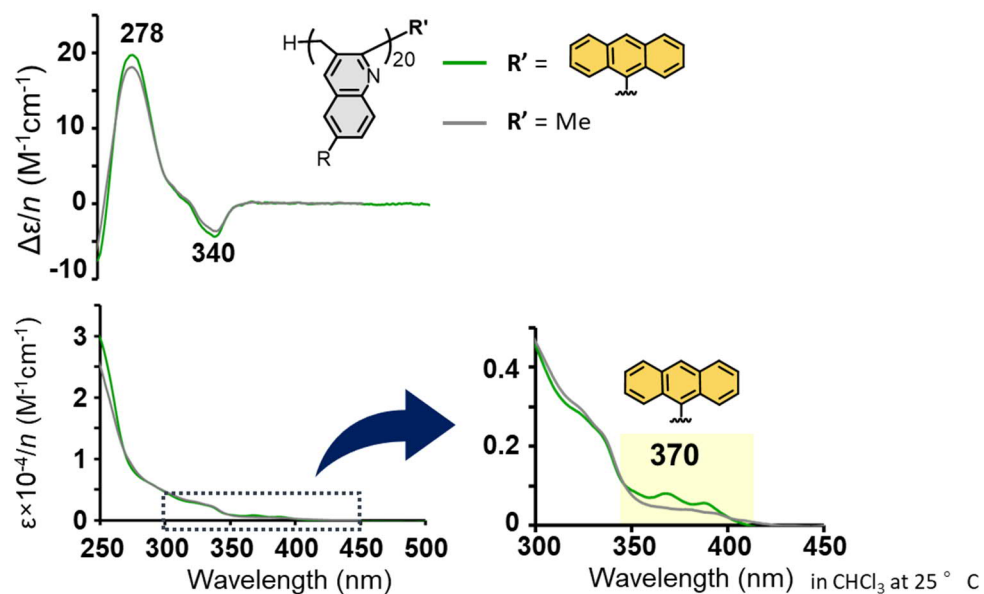

Fig S1. CD and UV spectra of **poly-1a<sub>20</sub>-Anth(a)** (green line) and **poly-1a<sub>20</sub>-Me** (gray line).

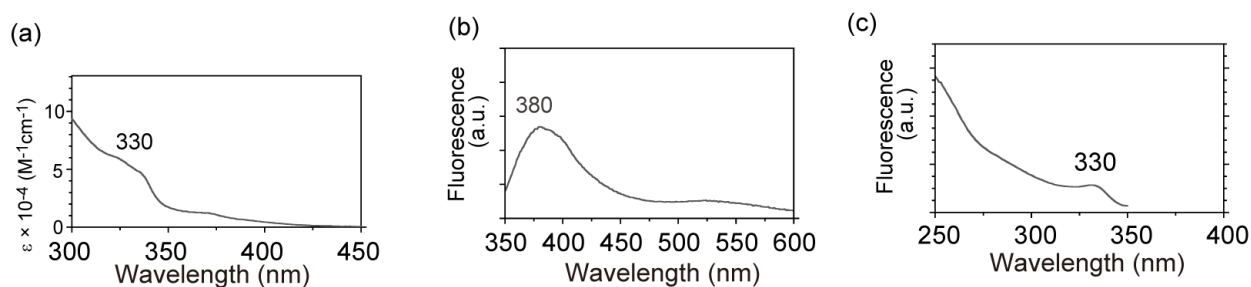

Fig S2. (a) UV, (b) emission excited at 330 nm, and (c) excitation at 380 nm spectra in CHCl<sub>3</sub> of **poly-1a<sub>20</sub>-Me**.

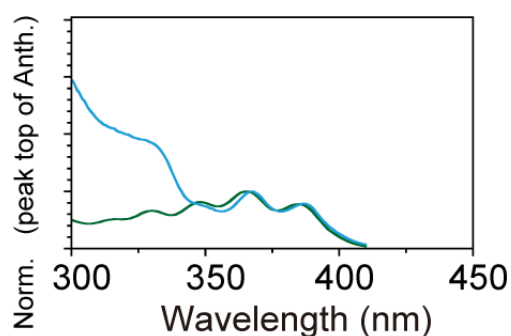

Fig S3. Excitation spectra of **poly-1a<sub>20</sub>-Anth(a)** (blue line) and **poly-1a<sub>1</sub>-Anth(a)** (green line) at 430 nm in CHCl<sub>3</sub>. The spectra were normalized by the peak top of anthracenyl group.

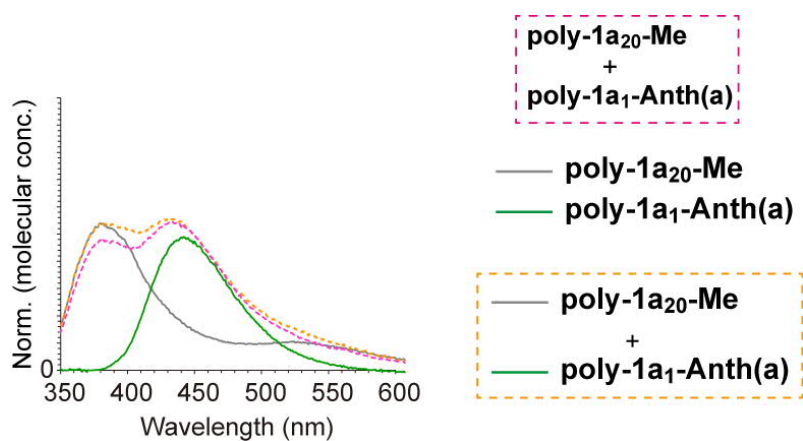

Fig S4. Emission spectra of **poly-1a<sub>20</sub>-Me** (grey line), **poly-1a<sub>1</sub>-Anth(a)** (green line), and a mixture of **poly-1a<sub>20</sub>-Me** and **poly-1a<sub>1</sub>-Anth(a)** (dashed pink line) in CHCl<sub>3</sub> at excited 330 nm. The sum of the spectra of **poly-1a<sub>20</sub>-Me** and **poly-1a<sub>1</sub>-Anth(a)** (dashed orange line). The spectra were normalized by molecular concentration.

In our previous study,<sup>3</sup> when the  $\pi$ -stacking structure was collapsed, the absorption band at 315 and 329 nm was appeared. Compared with the UV spectra **poly-1a<sub>20</sub>-Anth(a)** (green line) and **poly-1c<sub>20</sub>-Anth(a)** (purple line), the UV spectrum of **poly-1b<sub>20</sub>-Anth(a)** (pink line) shows a weaker absorption band at 316 and 330 nm originated from aromatic chromophores without  $\pi$ -stacking conformation, which is in agreement with previous results of **poly-1<sub>20</sub>-Me** bearing methyl group at  $\alpha$ -chain end. These results suggested that **poly-1b<sub>20</sub>-Anth(a)** forms an incomplete  $\pi$ -stacked structure.

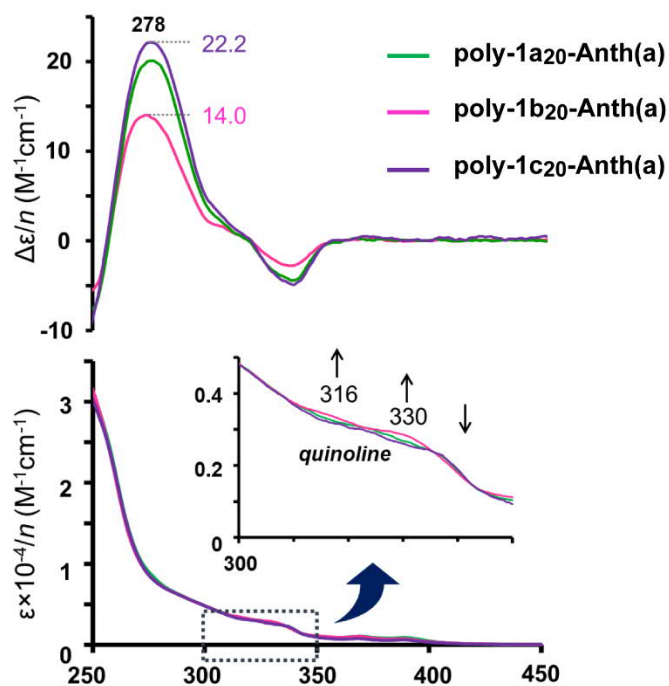

Fig S5. CD and UV spectra of poly **poly-1a<sub>20</sub>-Anth(a)** (green line), **poly-1b<sub>20</sub>-Anth(a)** (pink line) and **poly-1c<sub>20</sub>-Anth(a)** (purple line).

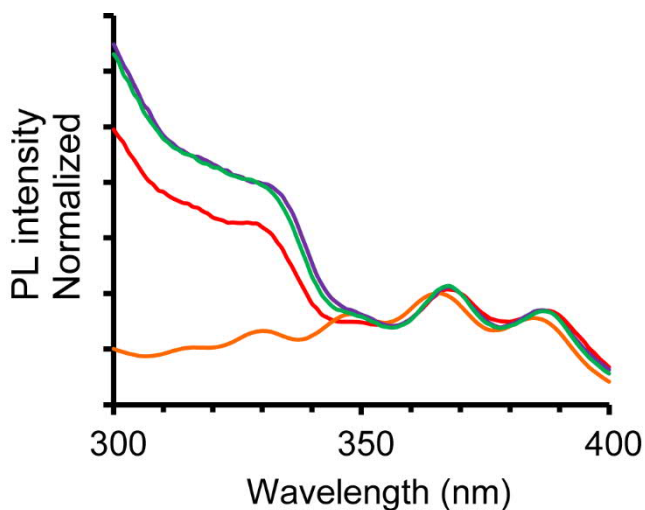

Fig S6. Excitation spectra of poly **poly-1a<sub>20</sub>-Anth(a)** (green line), **poly-1b<sub>20</sub>-Anth(a)** (red line), **poly-1c<sub>20</sub>-Anth(a)** (purple line) and **poly-1a<sub>1</sub>-Anth(a)** (orange line) excited at 430 nm in CHCl<sub>3</sub>.

## 2-2 Determination of Energy Transfer Efficiency

The energy transfer efficiency ( $E$ ) was determined using photoluminescent quantum yield ( $\Phi_{\text{PL}}$ ) and molar absorption coefficients ( $\epsilon$ ) of **poly-1<sub>n</sub>-Anth**, **poly-1<sub>n</sub>-Me**, and **poly-1<sub>1</sub>-Anth (model)**, according to the reported formula,<sup>3</sup> as described below. The calculation method of energy transfer efficiency of **poly-1a<sub>20</sub>-Anth(a)** using the  $\Phi_{\text{PL}}$  and  $\epsilon$  derived from **poly-1a<sub>20</sub>-Anth(a)**, **poly-1a<sub>20</sub>-Me** and **poly-1a<sub>1</sub>-Anth(a)** is shown below.

$$\Phi_{\text{poly-Anth}} = \{(1-E) \times (\epsilon_{\text{poly-Me}} / \epsilon_{\text{poly-Anth}}) \times \Phi_{\text{poly-Me}}\} + \{E \times (\epsilon_{\text{poly-Me}} / \epsilon_{\text{poly-Anth}}) \times \Phi_{\text{model}}\} + \{(\epsilon_{\text{model}} / \epsilon_{\text{poly-Anth}}) \times \Phi_{\text{model}}\}$$

**poly-1a<sub>20</sub>-Anth(a):**  $\Phi_{\text{poly-anth}} = 5.5\%$ ,  $\Phi_{\text{poly-Me}} = 2.3\%$ ,  $\Phi_{\text{model}} = 10.1\%$ ,  $\epsilon_{\text{poly-Me}} / \epsilon_{\text{poly-anth}} = 0.88$ ,  $\epsilon_{\text{model}} / \epsilon_{\text{poly-anth}} = 0.12$

$$5.5 = \{(1-E) \times (0.88) \times 2.3\} + \{E \times (0.88) \times 10.1\} + \{(0.12) \times 10.1\}$$

$$E = 34\%$$

### 3. MS Spectrum

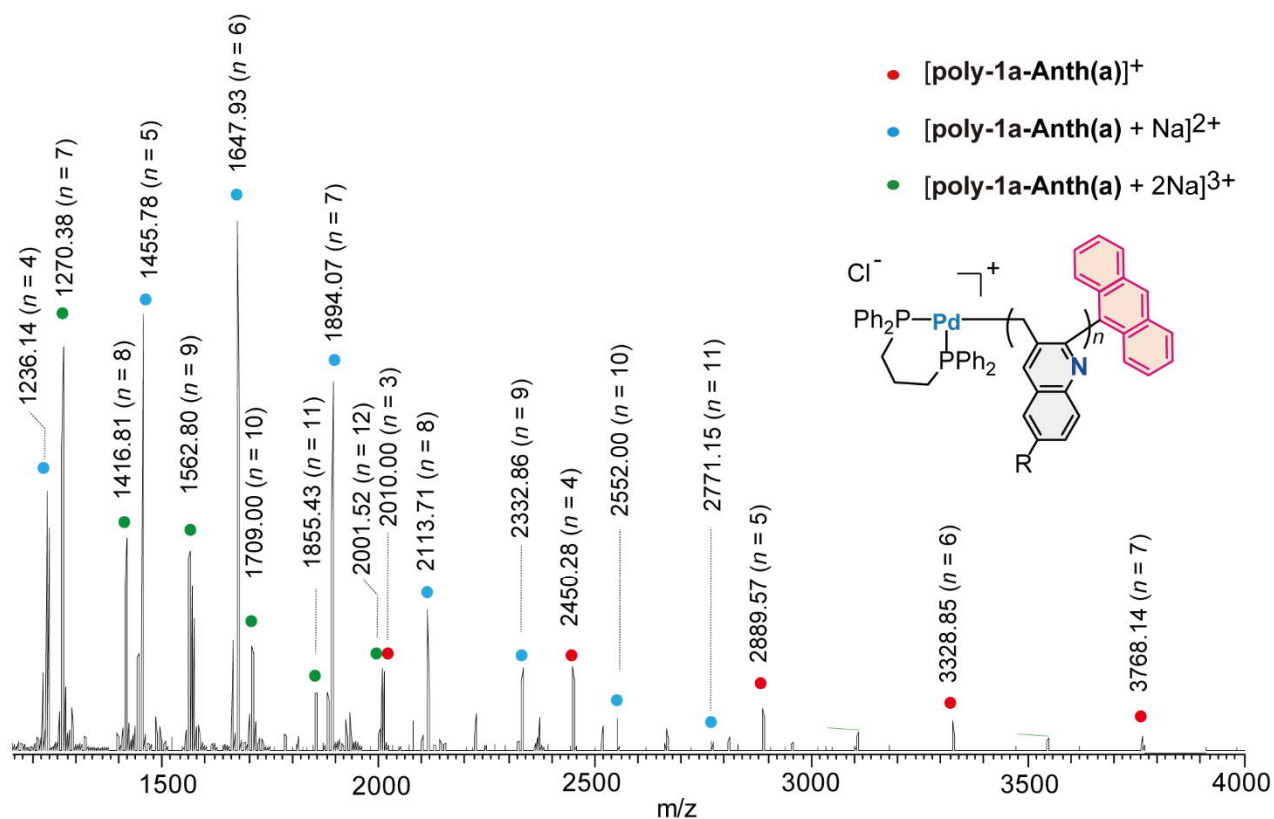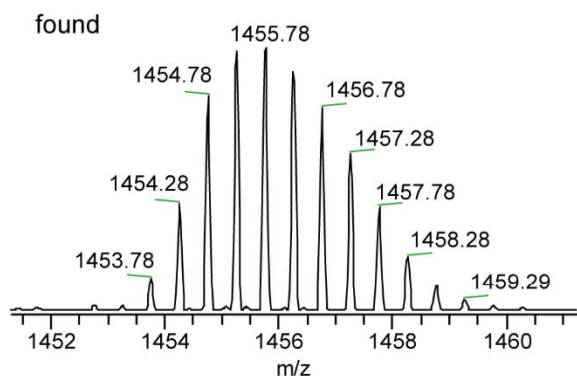

$n = 5$

•  $[\text{poly-1a}_5\text{-Anth(a)} + \text{Na}]^{2+}$

$\text{C}_{176}\text{H}_{225}\text{N}_{10}\text{O}_{15}\text{P}_2\text{Pd Na}$

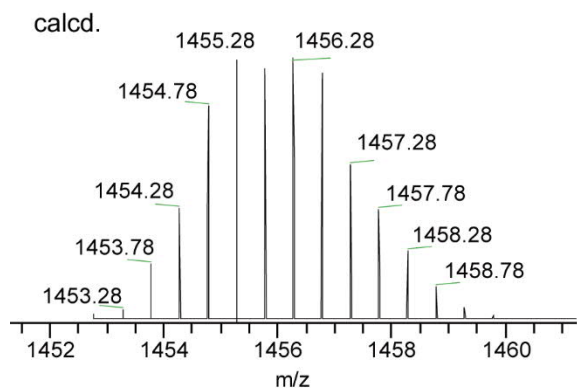

Fig S7. ESI-Orbitrap MS spectrum of **poly-1a<sub>7</sub>-Anth(a)** ( $M_{n(\text{SEC})} = 2100$ ,  $M_w/M_n = 1.12$ ;  $[\text{1a}]/[\text{Pd-Anth(a)}] = 7$ ) in MeOH/CH<sub>2</sub>Cl<sub>2</sub> (= 1/1). The Expand spectra of **poly-1a<sub>5</sub>-Anth(a)** ( $z = 2$ ).

### 3. References

1. Kanbayashi, N.; Kataoka, Y.; Okamura, T.; Onitsuka, K., Stability Enhancement of a  $\pi$ -Stacked Helical Structure Using Substituents of an Amino Acid Side Chain: Helix Formation via a Nucleation–Elongation Mechanism. *J. Am. Chem. Soc.* **2022**, *144* (13), 6080-6090.
2. Kataoka, Y.; Kanbayashi, N.; Fujii, N.; Okamura, T.; Haino, T.; Onitsuka, K., Construction of Helically Stacked  $\pi$ -Electron Systems in Poly(quinolylene-2,3-methylene) Stabilized by Intramolecular Hydrogen Bonds. *Angew. Chem. Int. Ed.* **2020**, *59* (26), 10286-10291.
3. T. Nishikawa, Y. Nagata and M. Suginome, Poly(quinoxaline-2,3-diyl) as a Multifunctional Chiral Scaffold for Circularly Polarized Luminescent Materials: Color Tuning, Energy Transfer, and Switching of the CPL Handedness. *ACS Macro Lett.*, **2017**, *6*, 431-435.

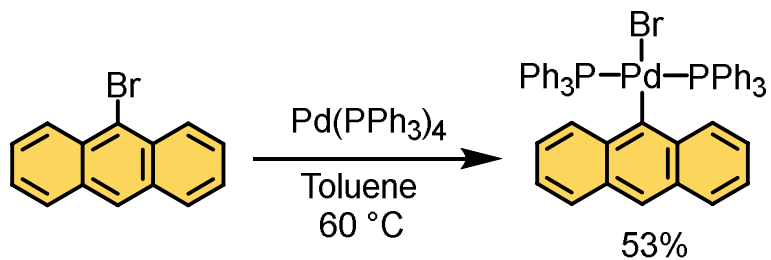

$^1\text{H}$  NMR in  $\text{CDCl}_3$  at 25 °C

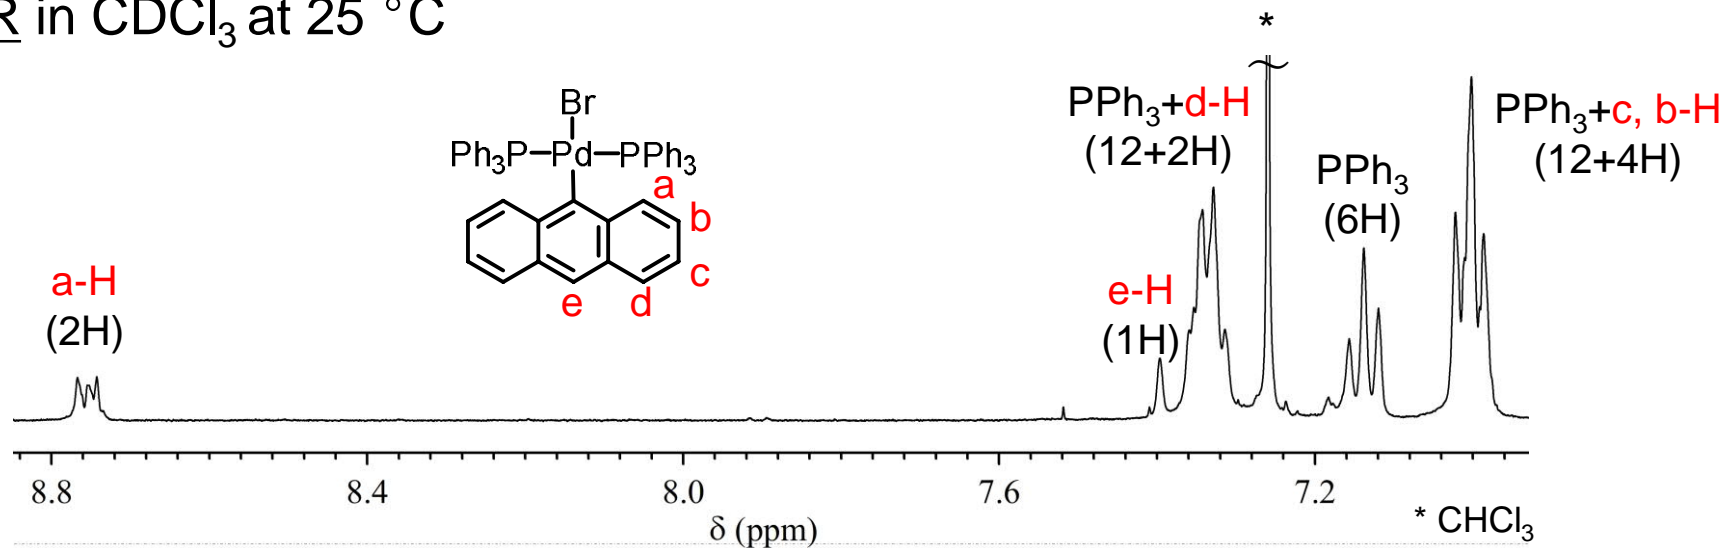

$^{31}\text{H}$  NMR in  $\text{CDCl}_3$  at 25 °C

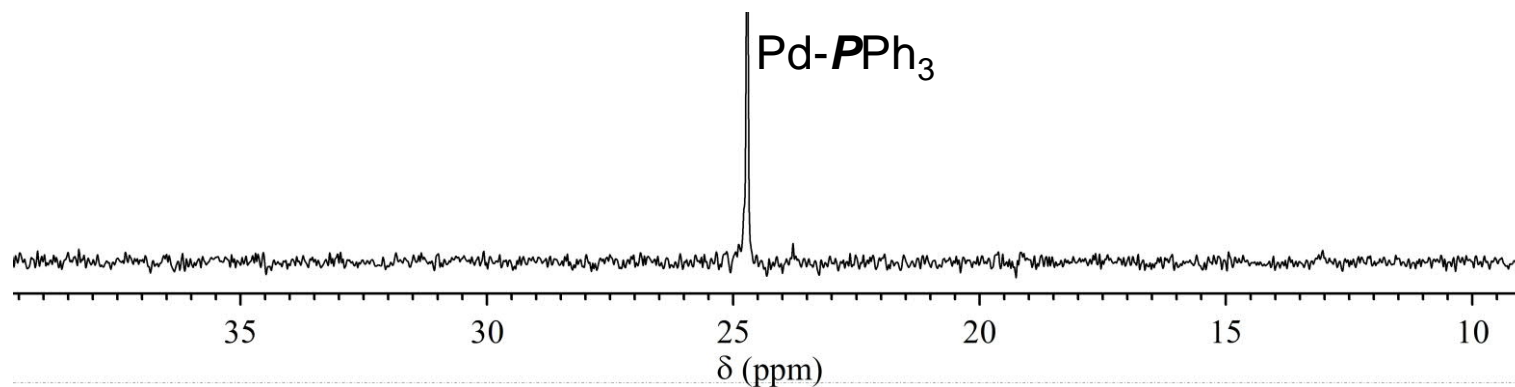

$^1\text{H}$  NMR in  $\text{CDCl}_3$  at  $25\text{ }^\circ\text{C}$

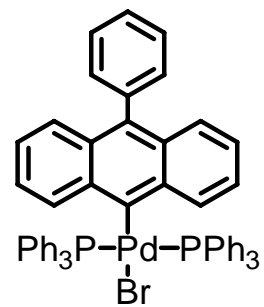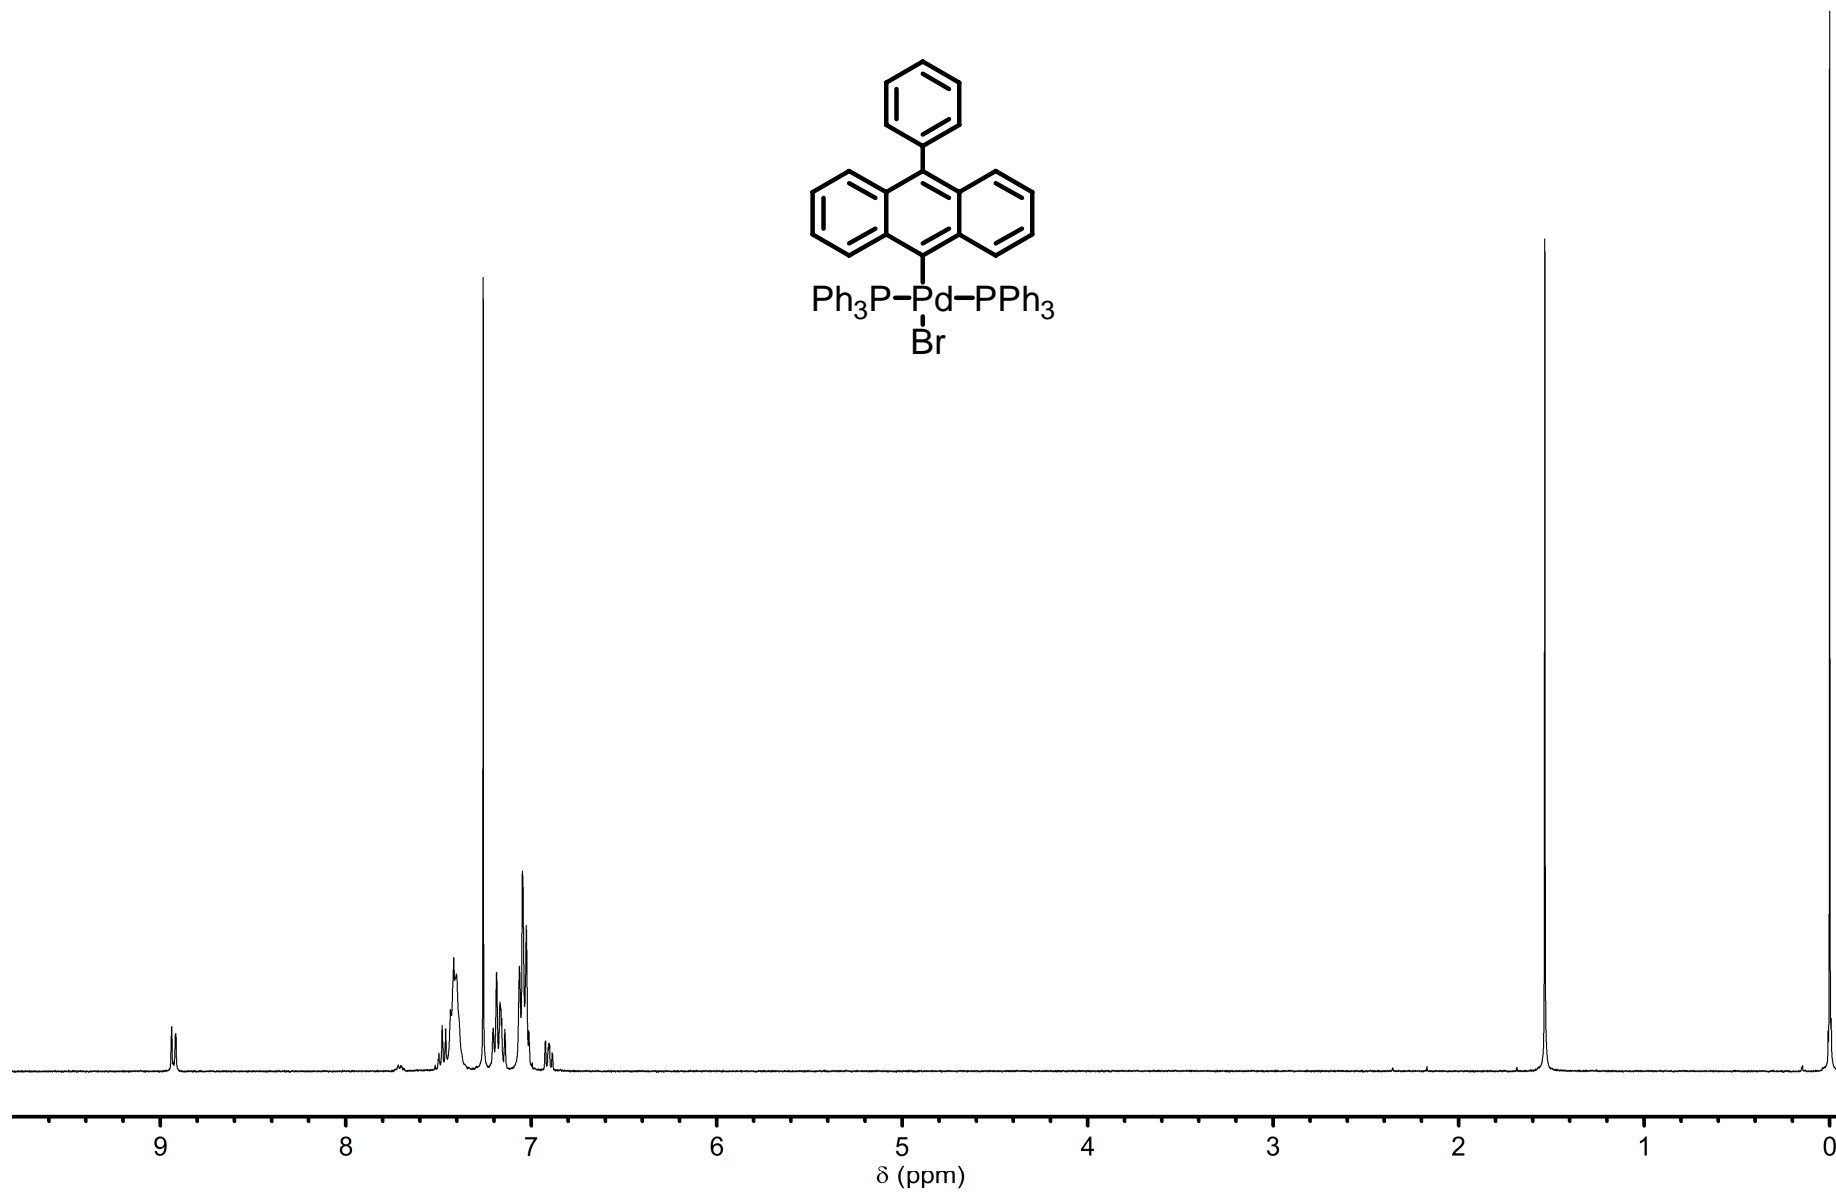

$^{13}\text{C}$  NMR in  $\text{CDCl}_3$  at 25 °C

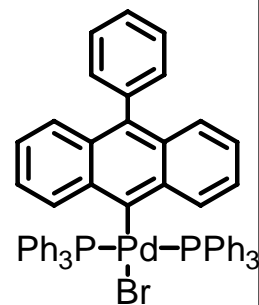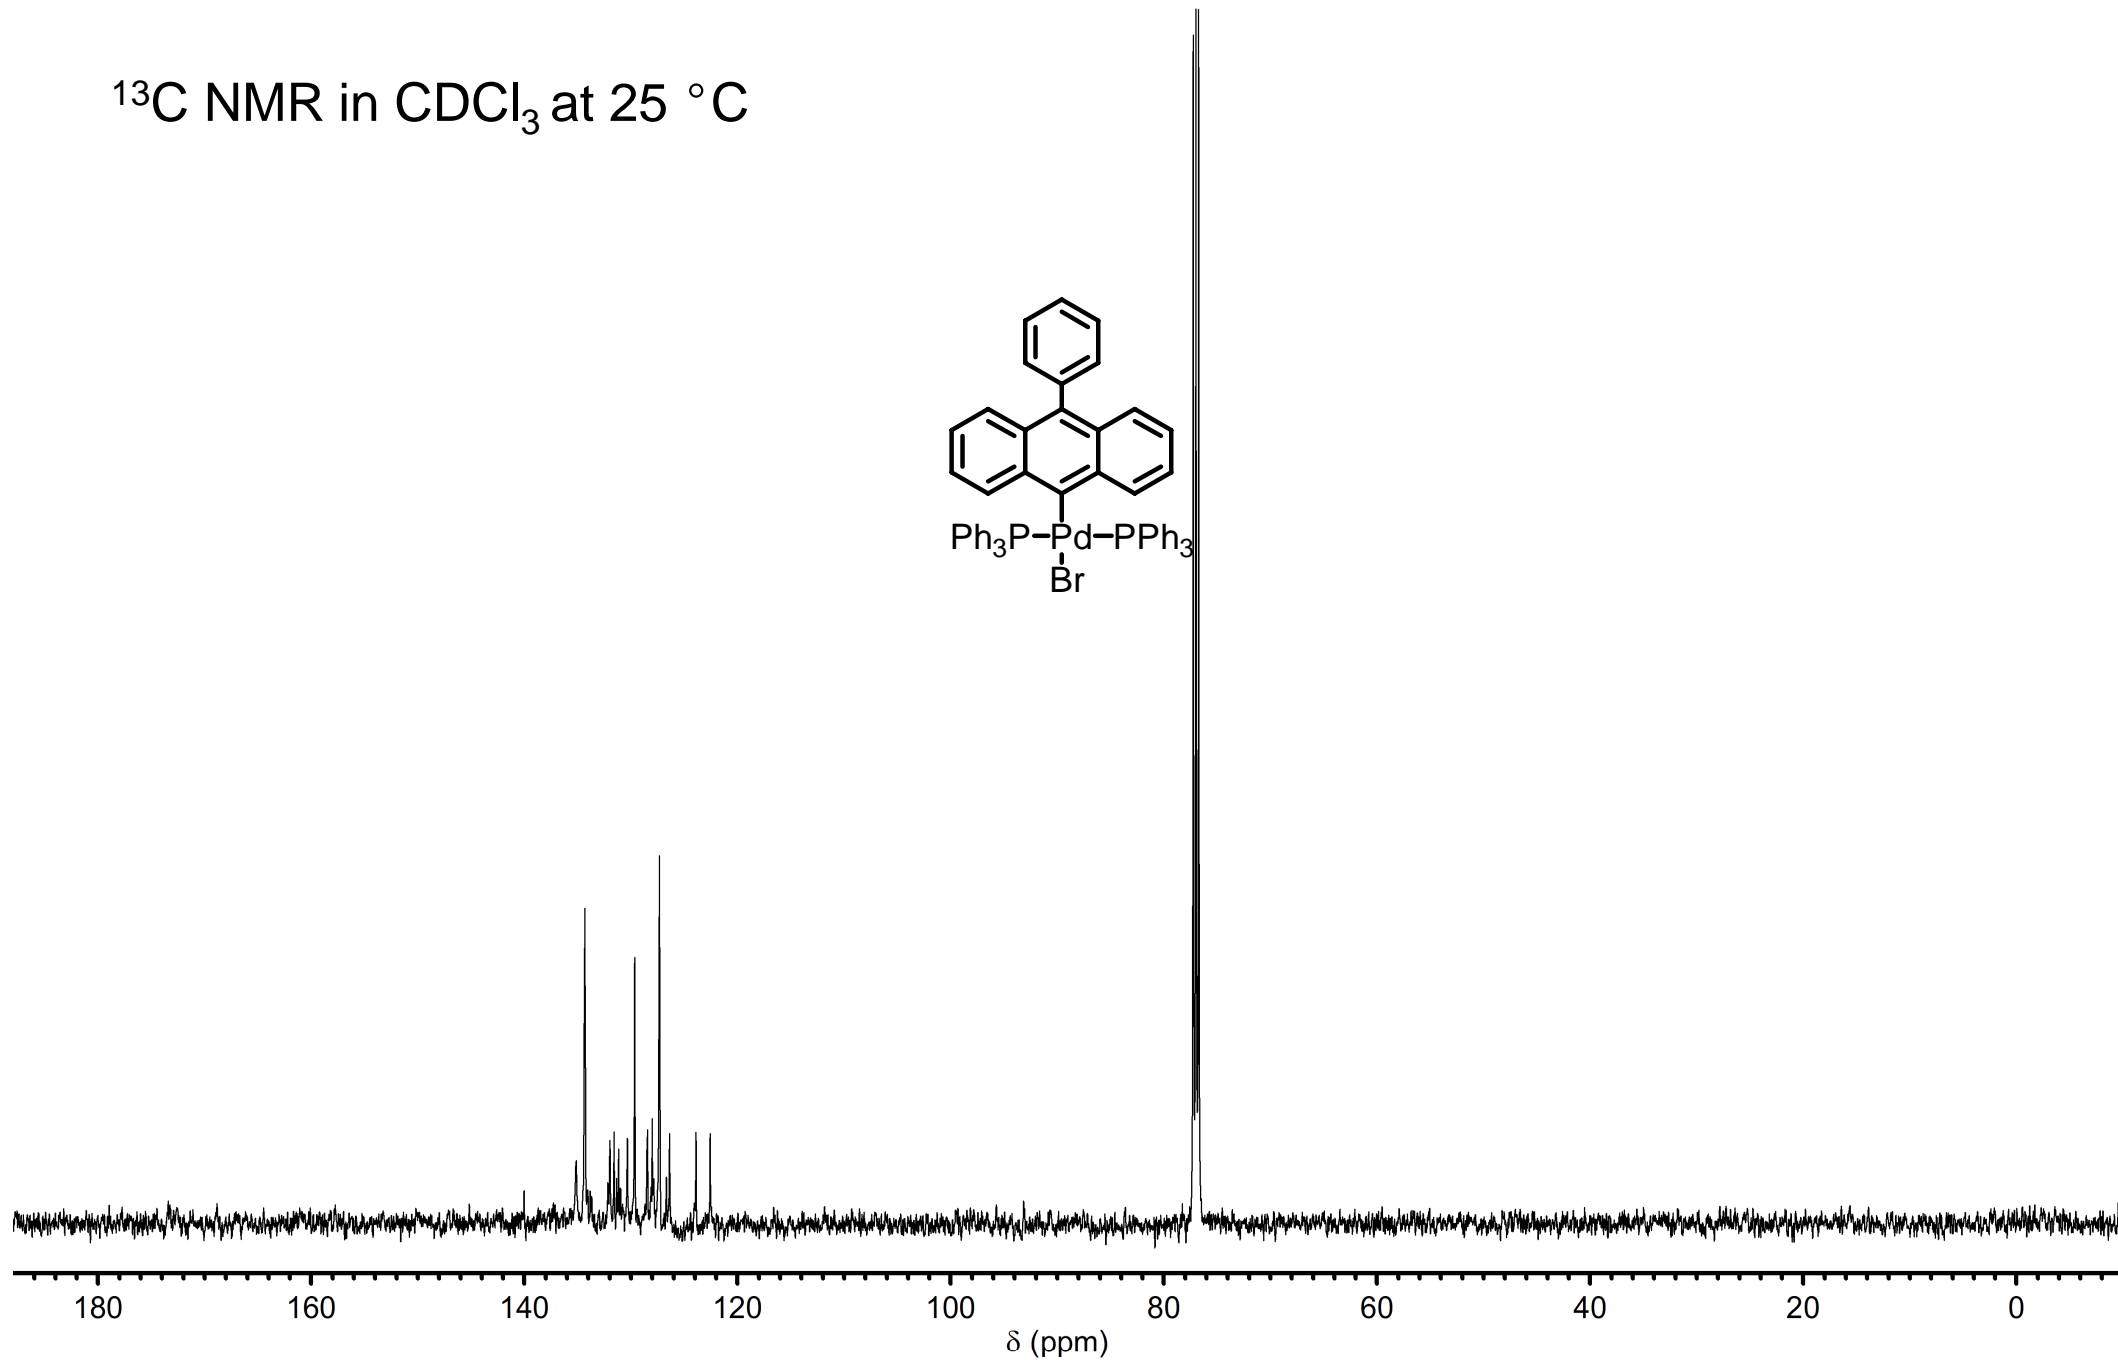

$^{31}\text{P}$  NMR in  $\text{CDCl}_3$  at  $25^\circ\text{C}$

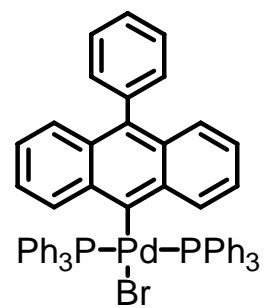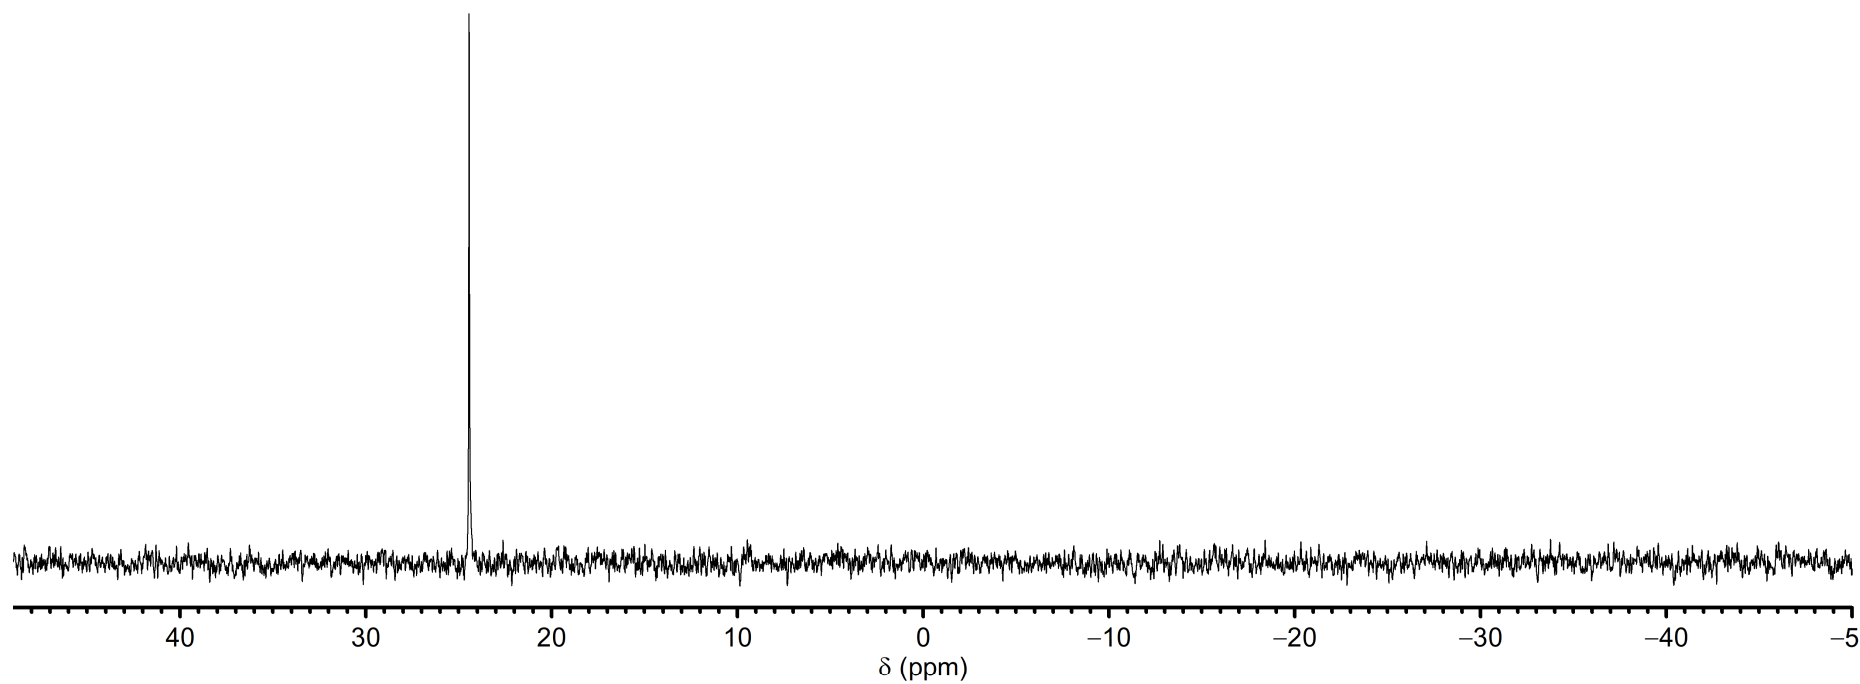

$^1\text{H}$  NMR in  $\text{CDCl}_3$  at 25 °C

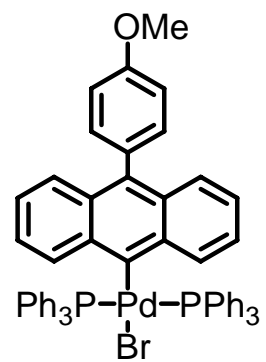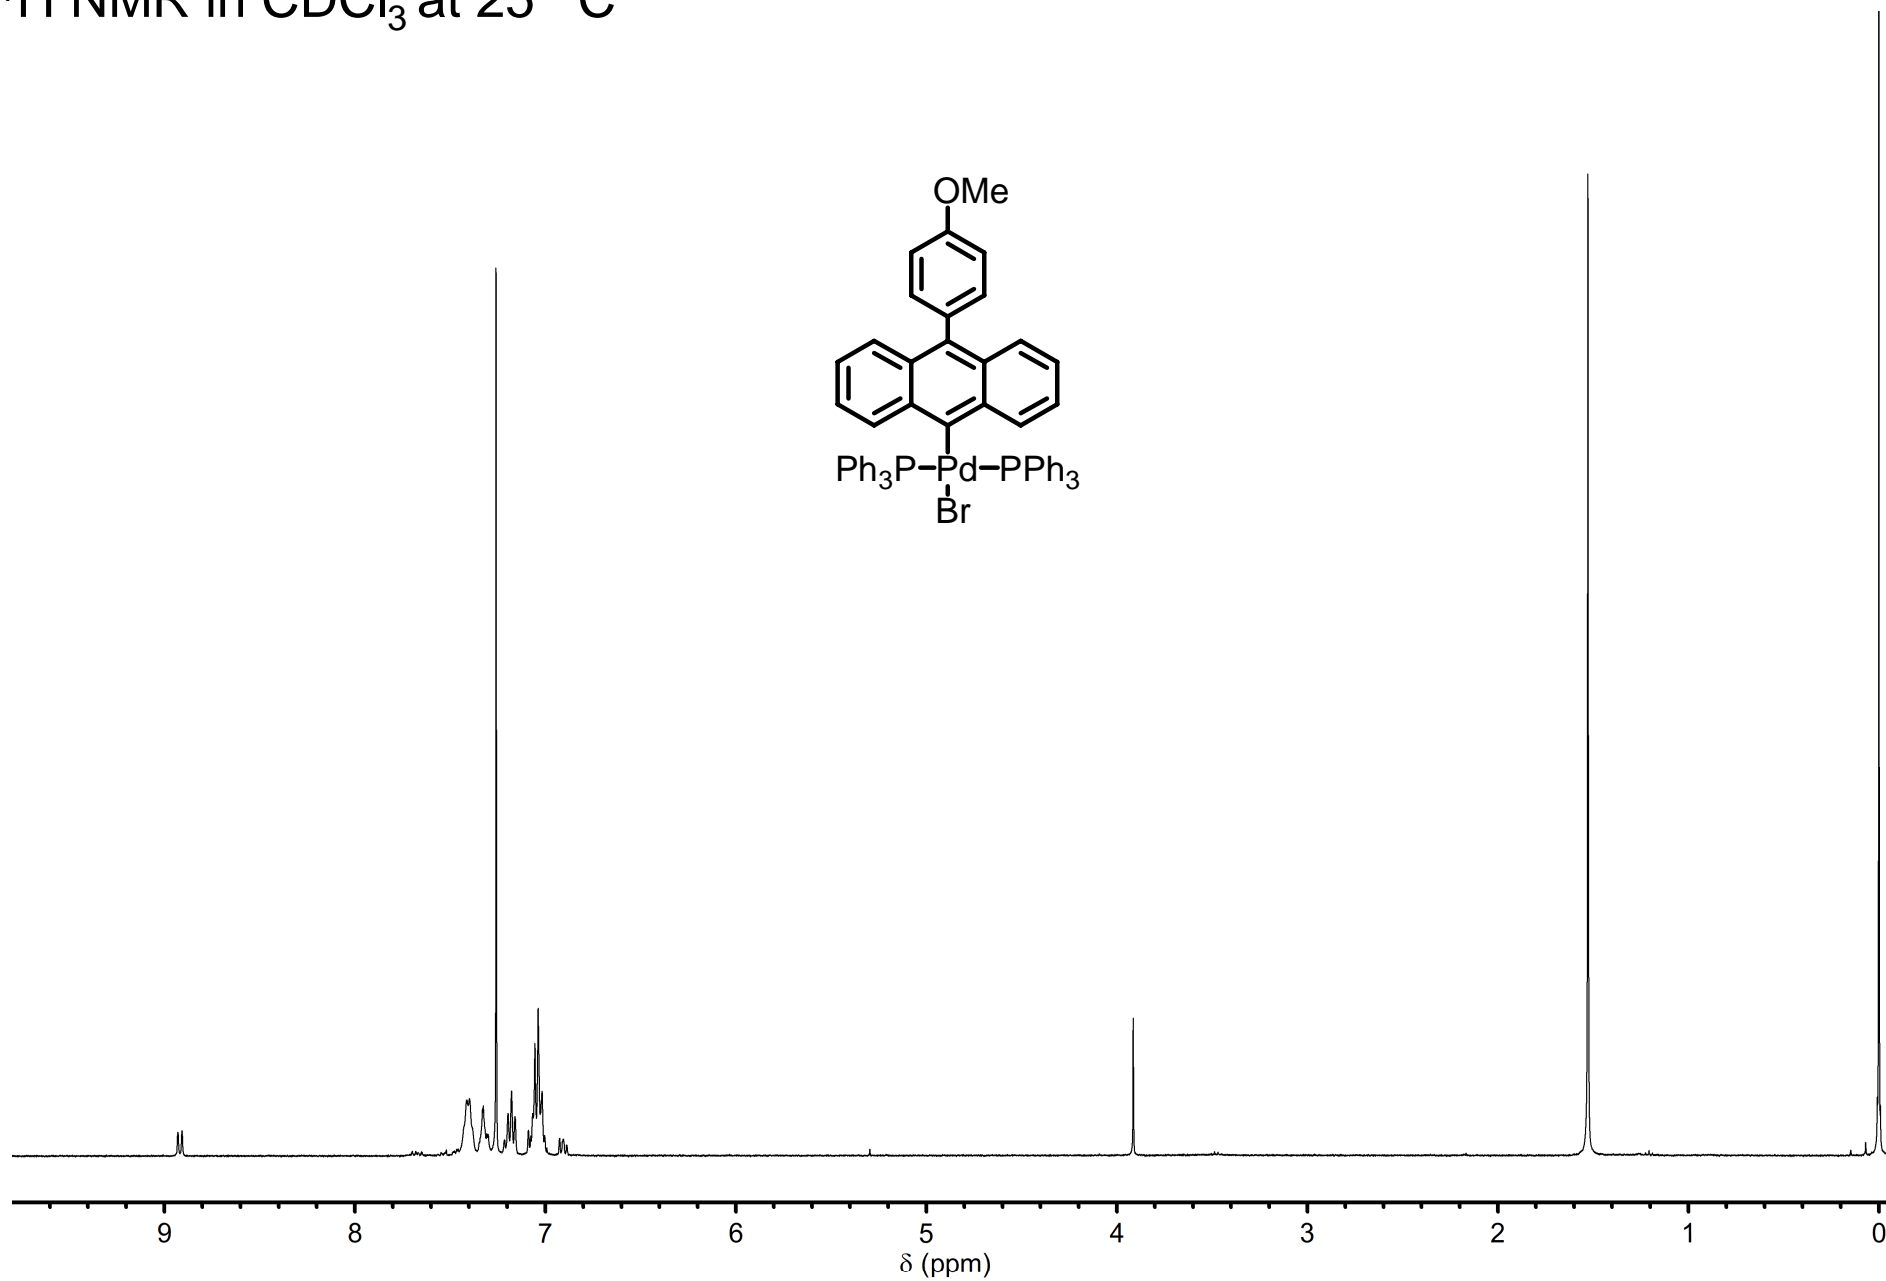

$^{13}\text{C}$  NMR in  $\text{CDCl}_3$  at 25 °C

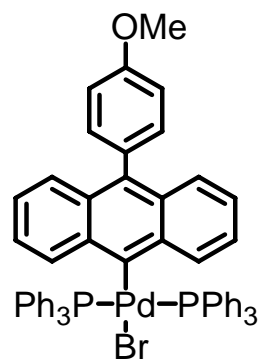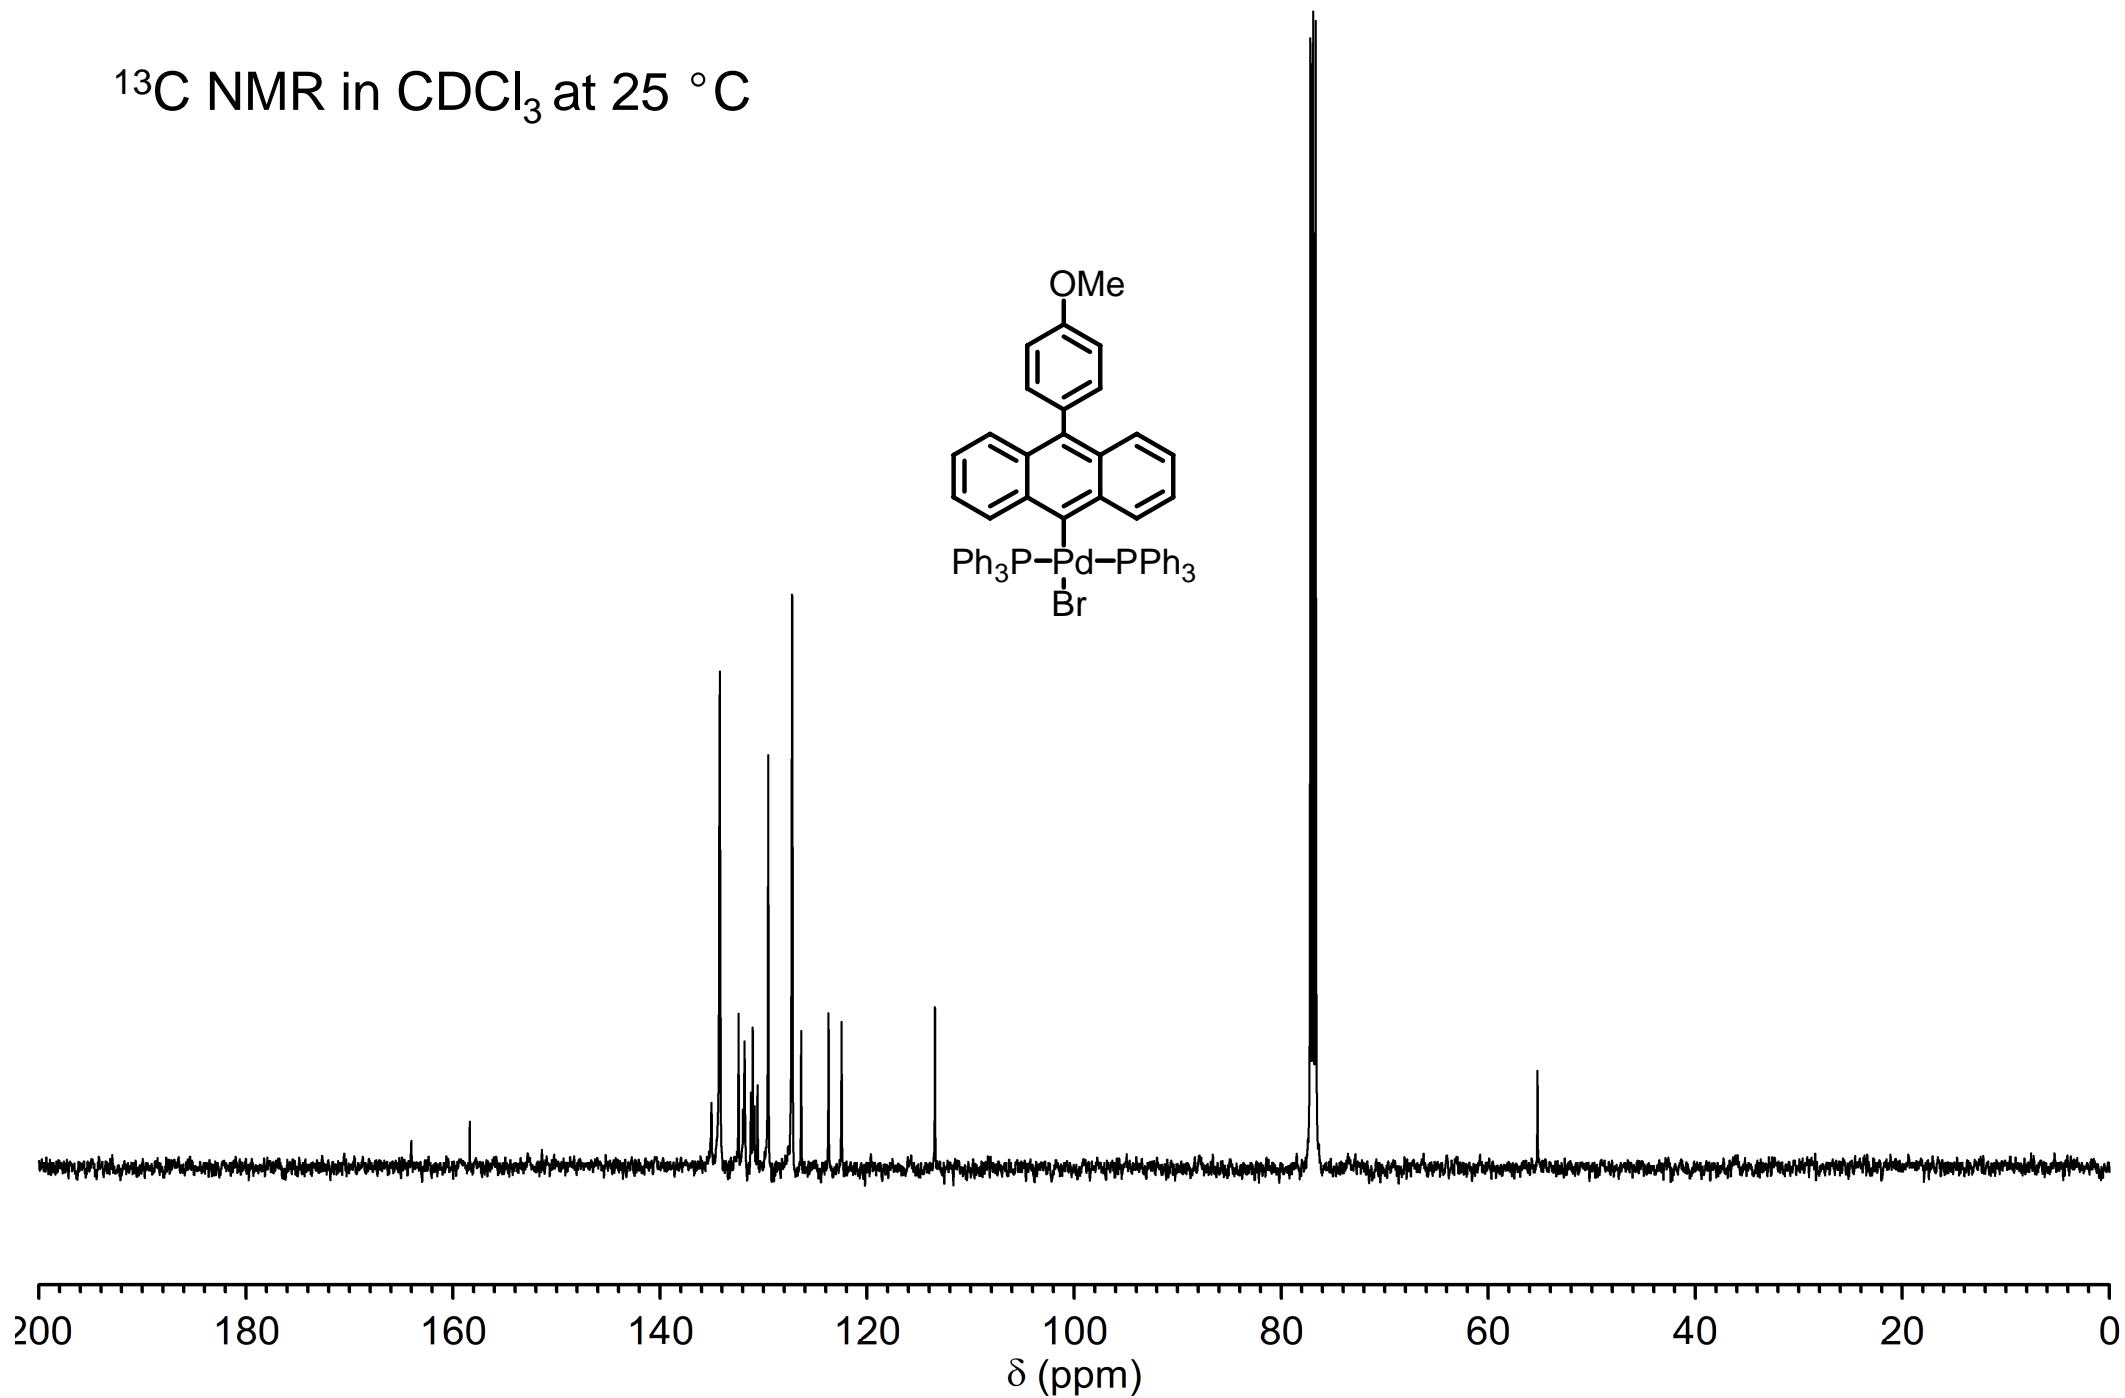

$^{31}\text{P}$  NMR in  $\text{CDCl}_3$  at 25 °C

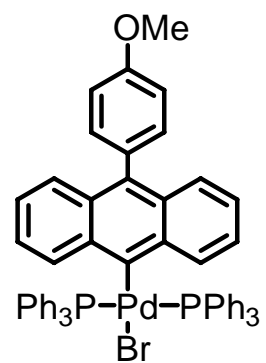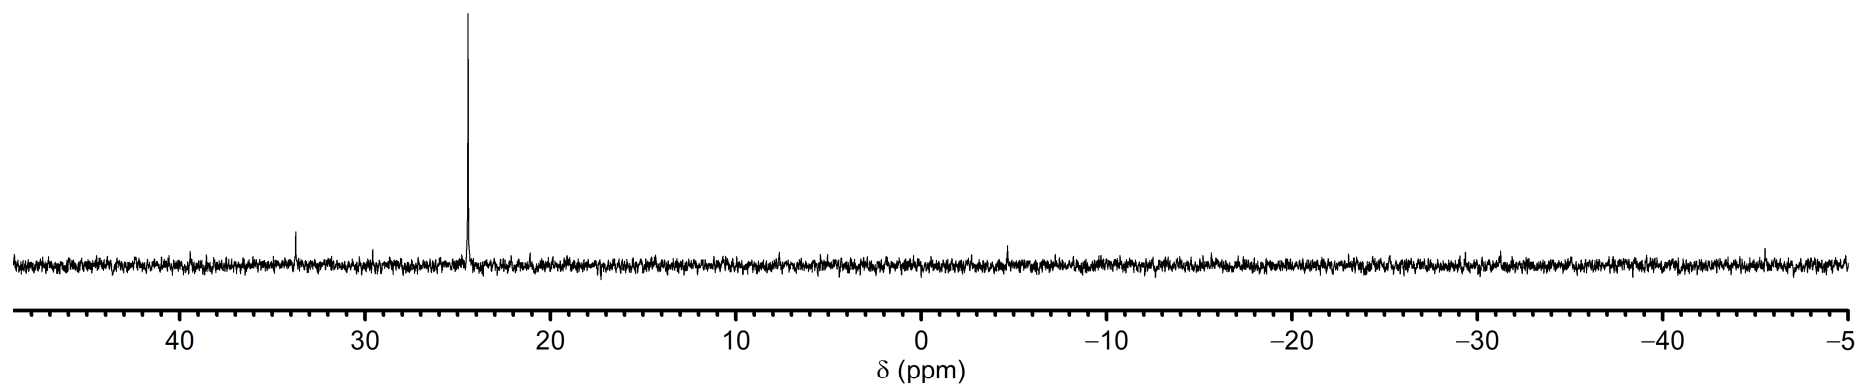

$^1\text{H}$  NMR in  $\text{CDCl}_3$  at 25 °C

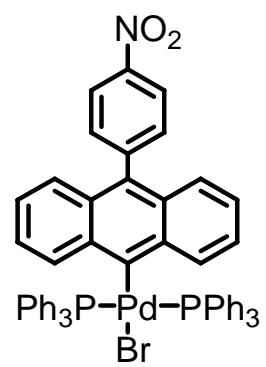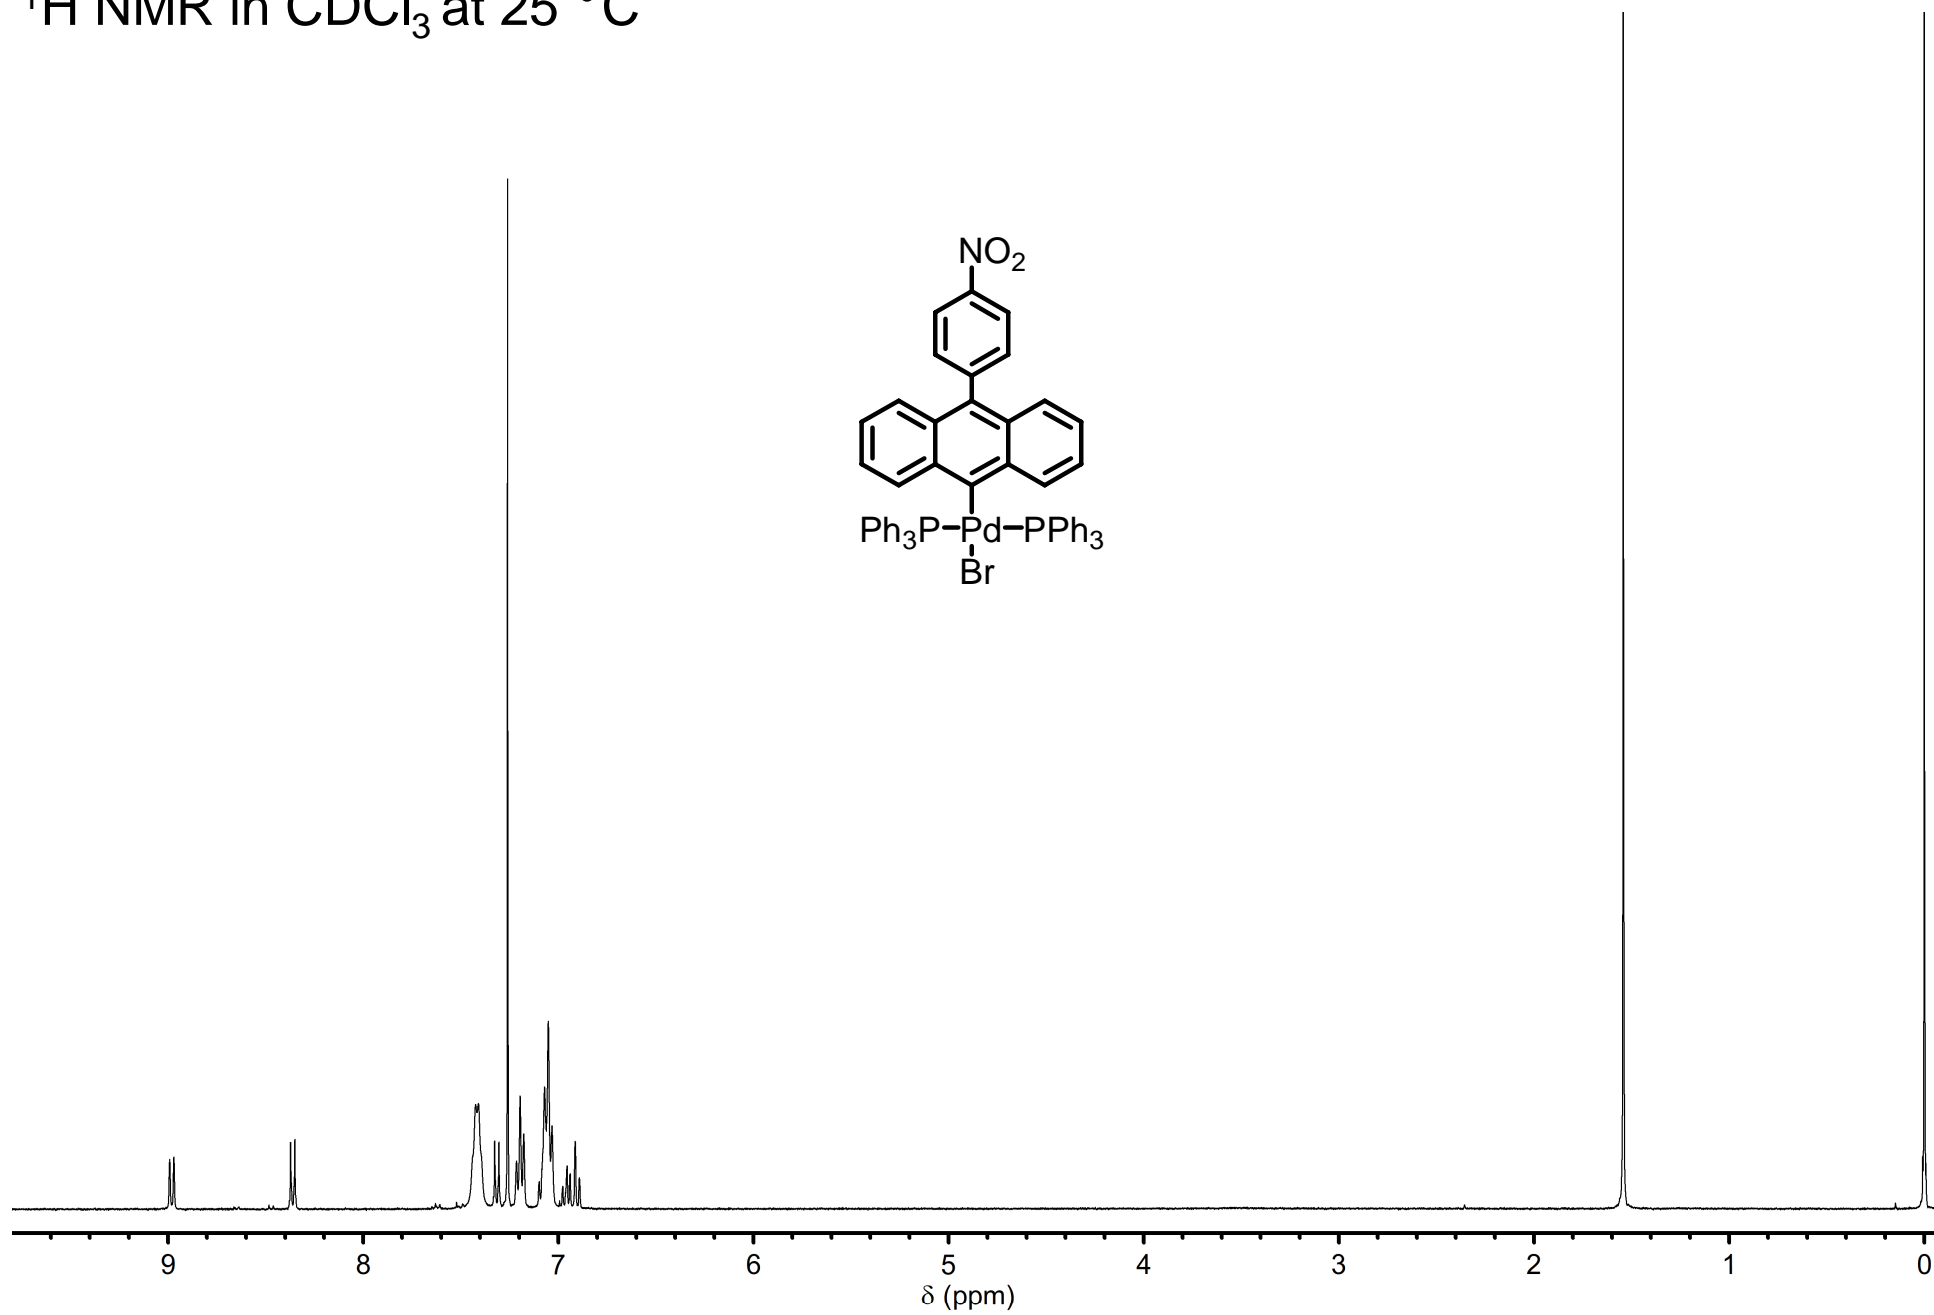

$^{13}\text{C}$  NMR in  $\text{CDCl}_3$  at 25 °C

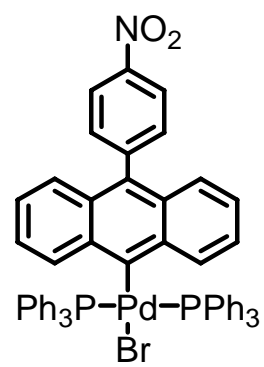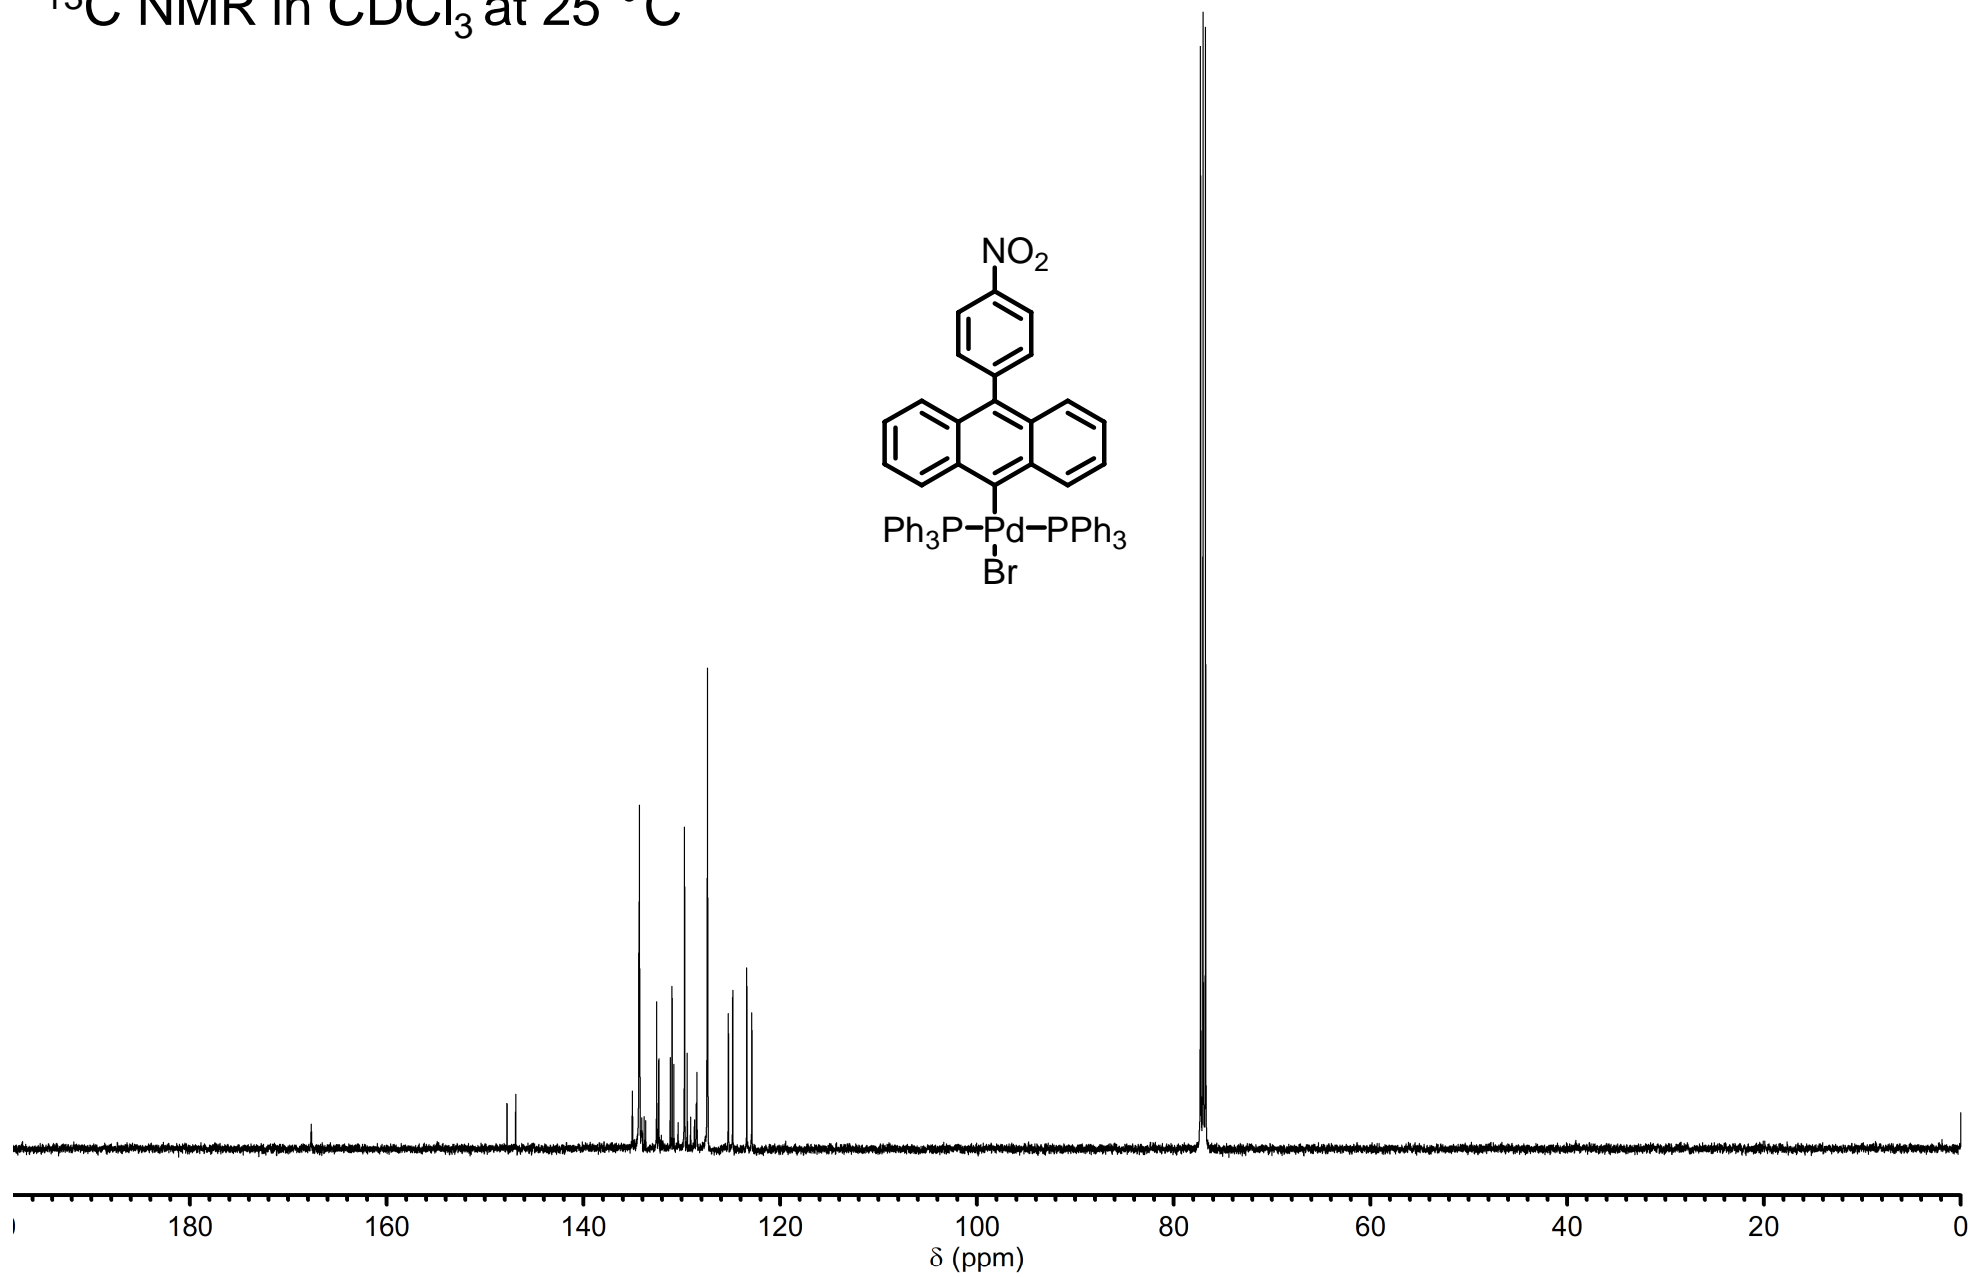

$^{31}\text{P}$  NMR in  $\text{CDCl}_3$  at 25 °C

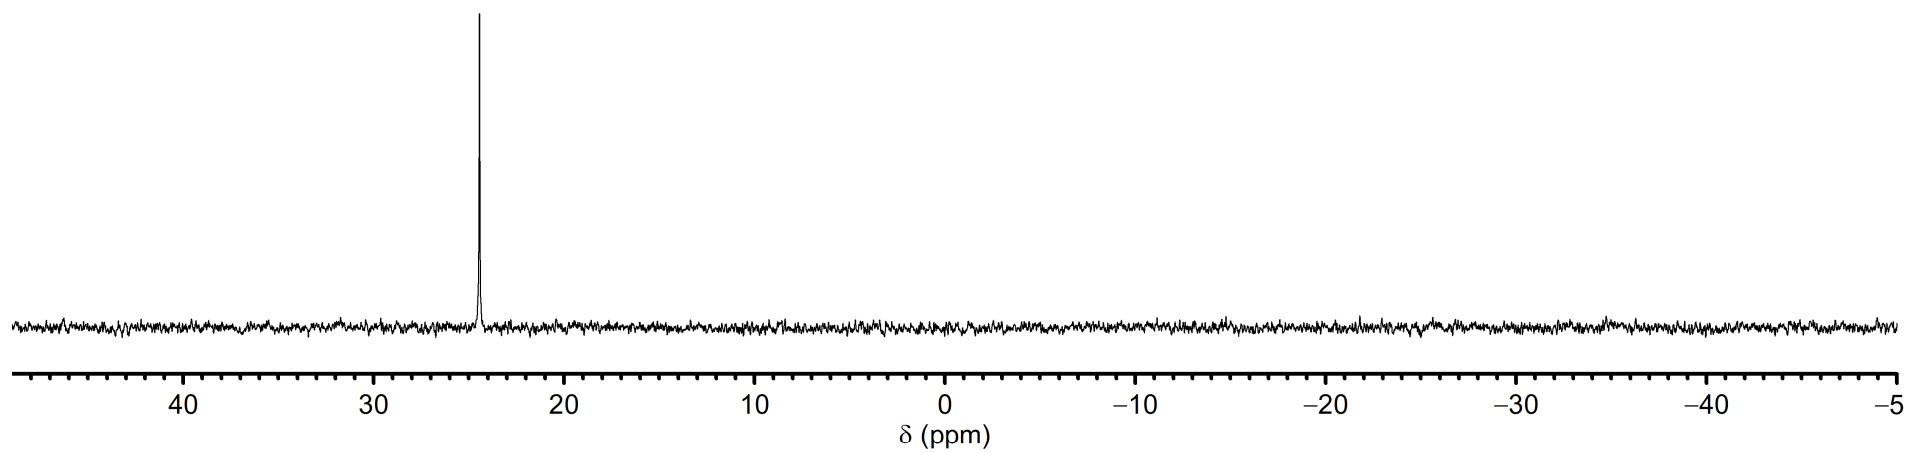

$^1\text{H}$  NMR in  $\text{CDCl}_3/d^6\text{-DMSO}$  at  $25\text{ }^\circ\text{C}$

poly-1a<sub>20</sub>-Anth(a)

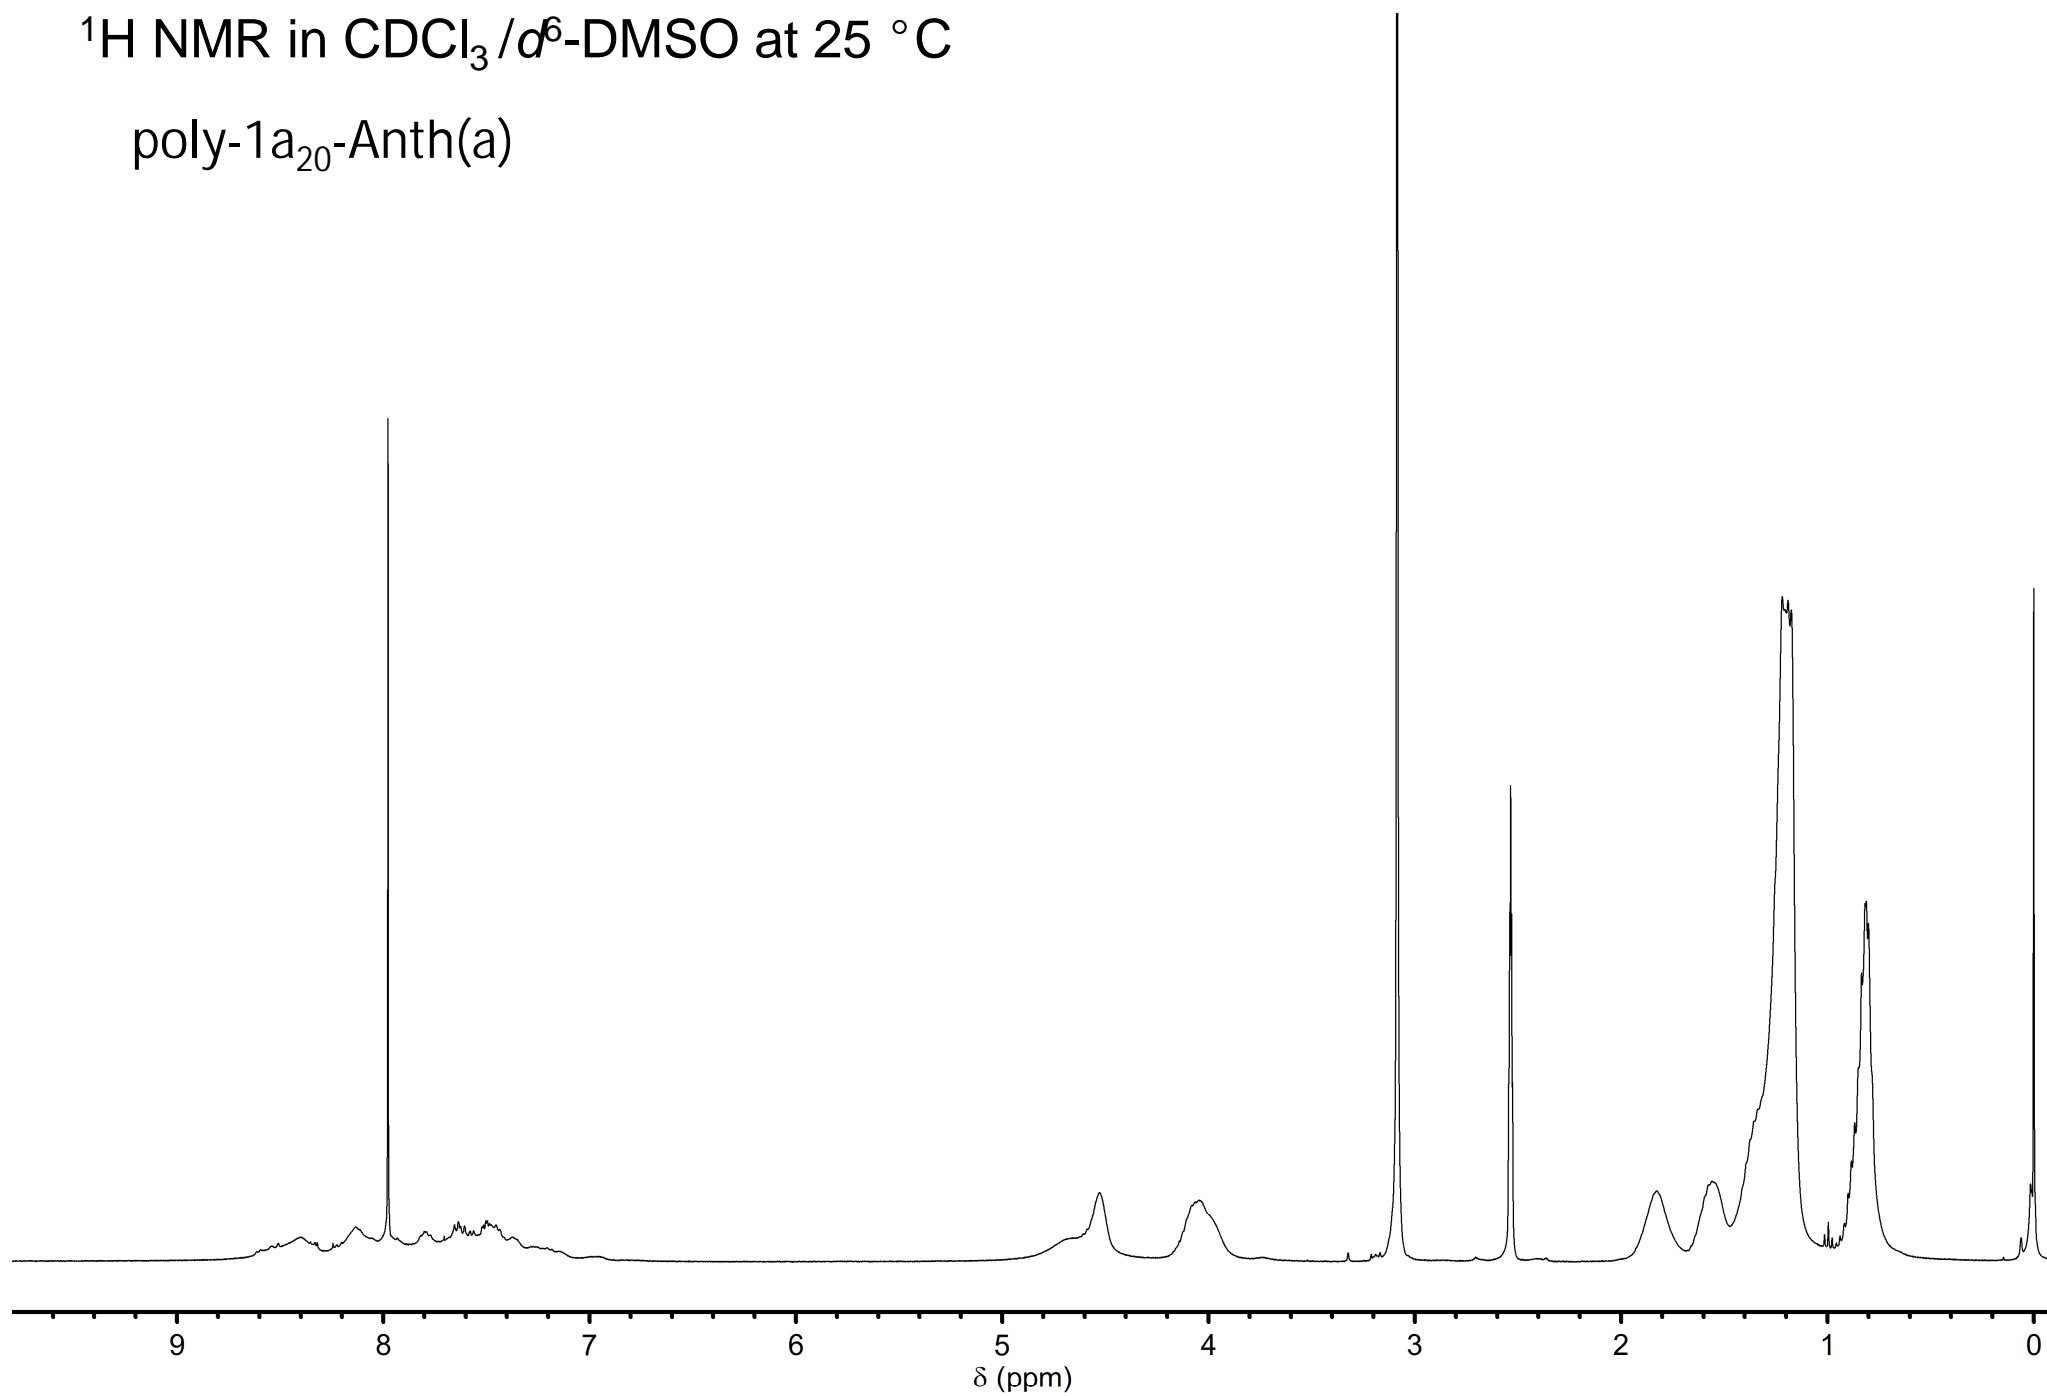

$^{13}\text{C}$  NMR in  $\text{CDCl}_3$  at 25 °C

poly-1a<sub>20</sub>-Anth(a)

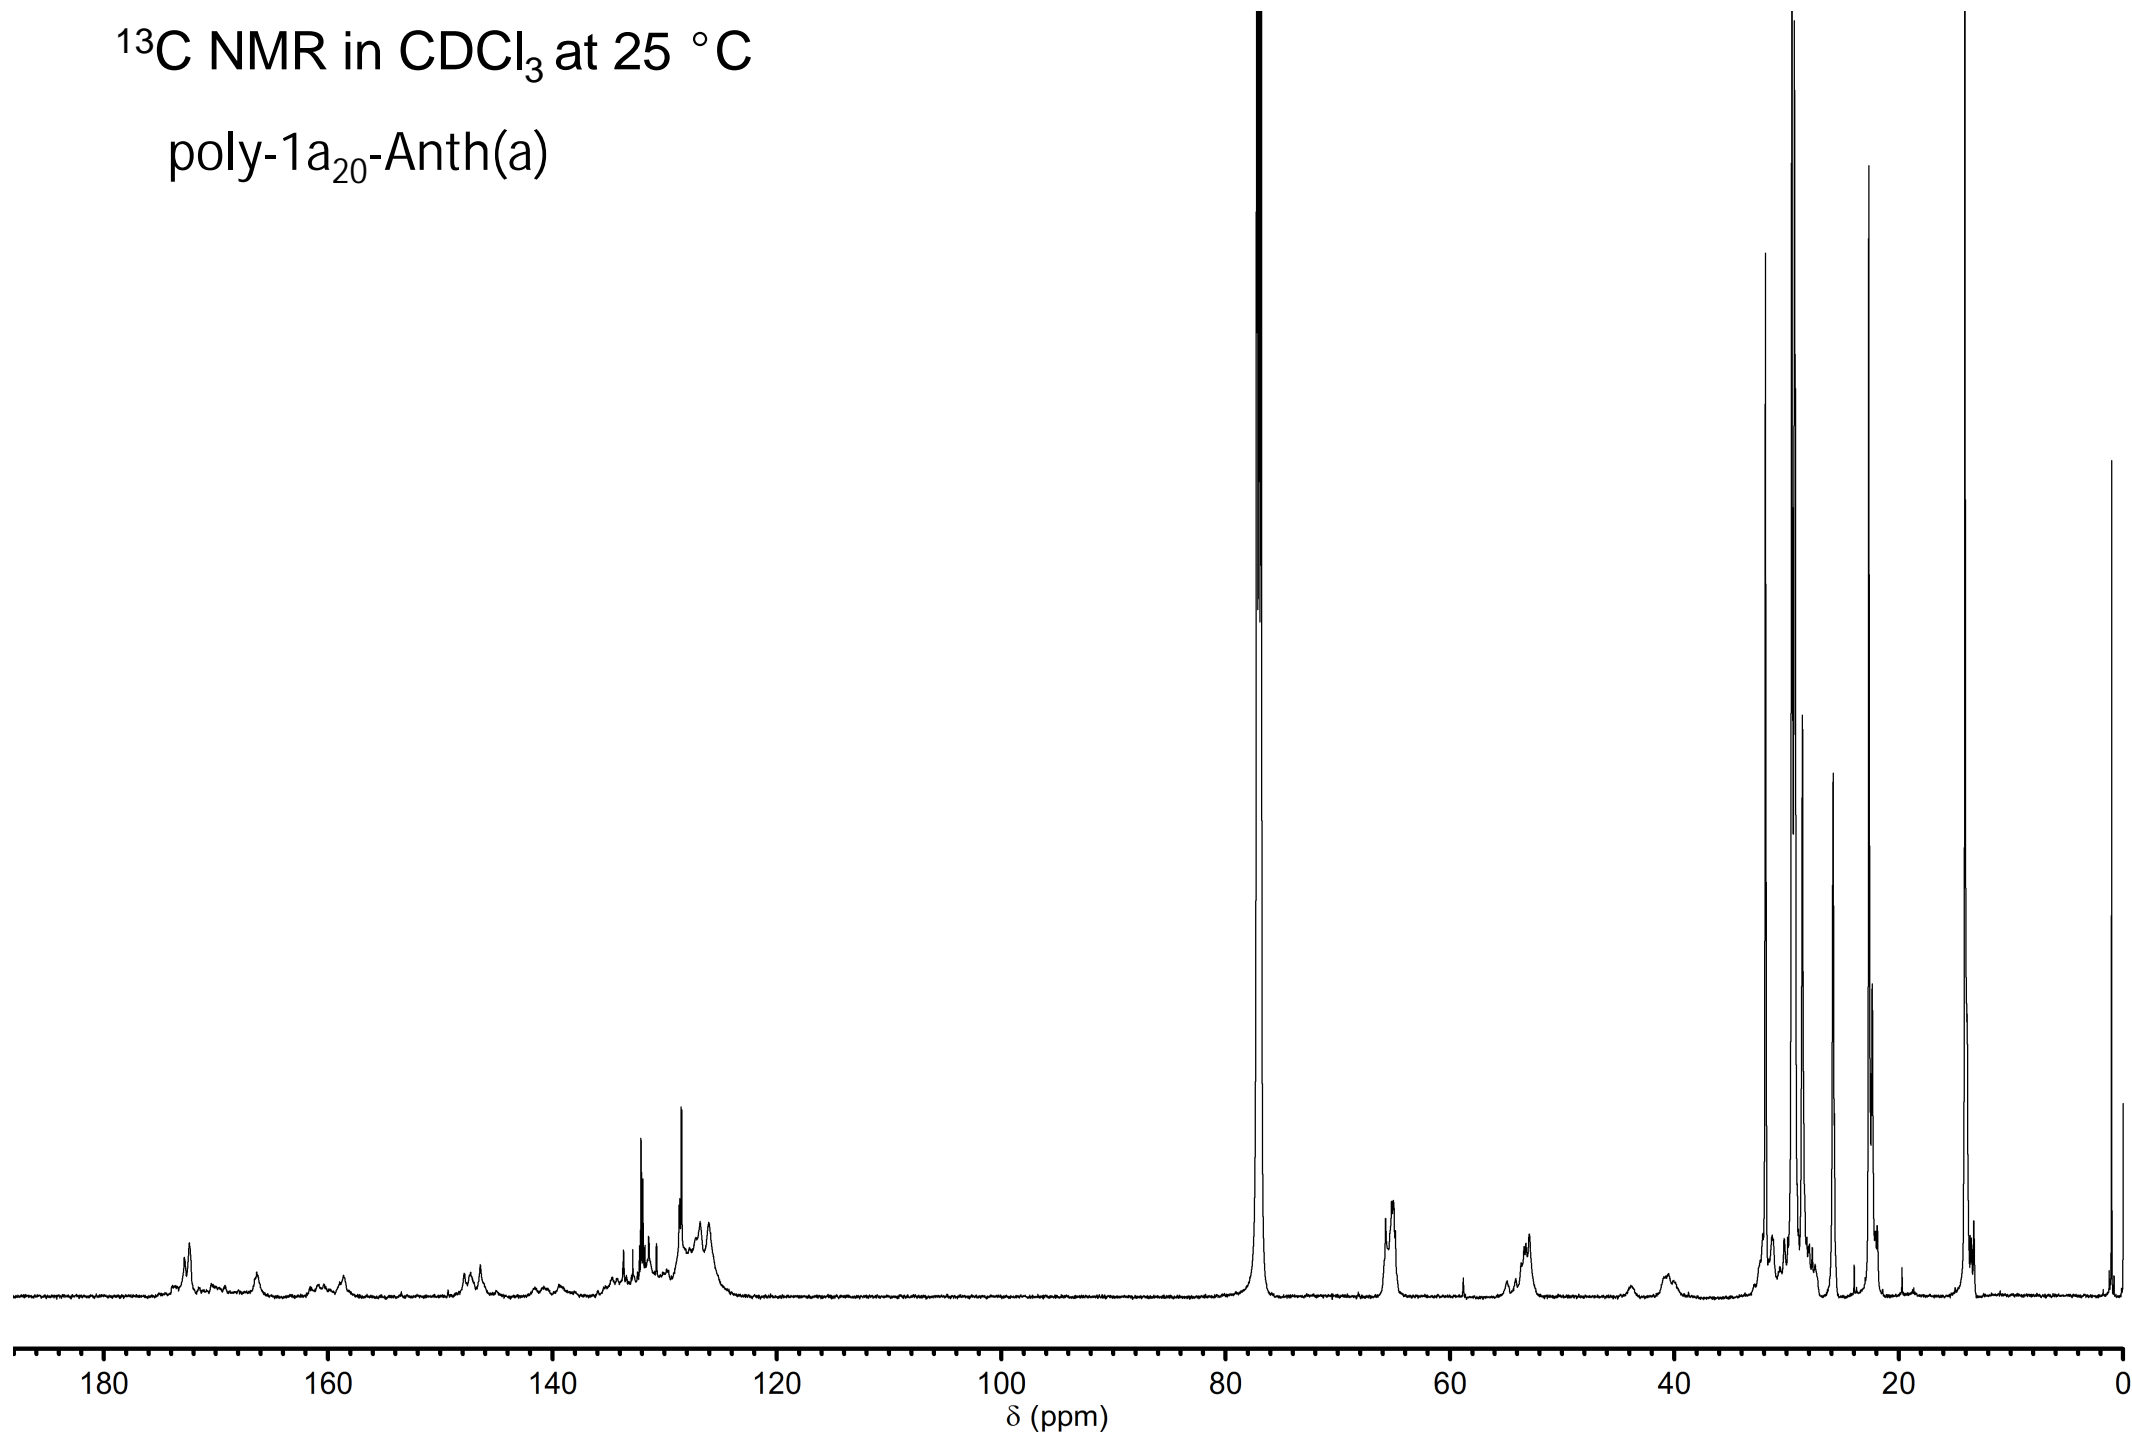

$^1\text{H}$  NMR in  $\text{CDCl}_3/d^6\text{-DMSO}$  at 25 °C

poly-1b<sub>20</sub>-Anth(a)

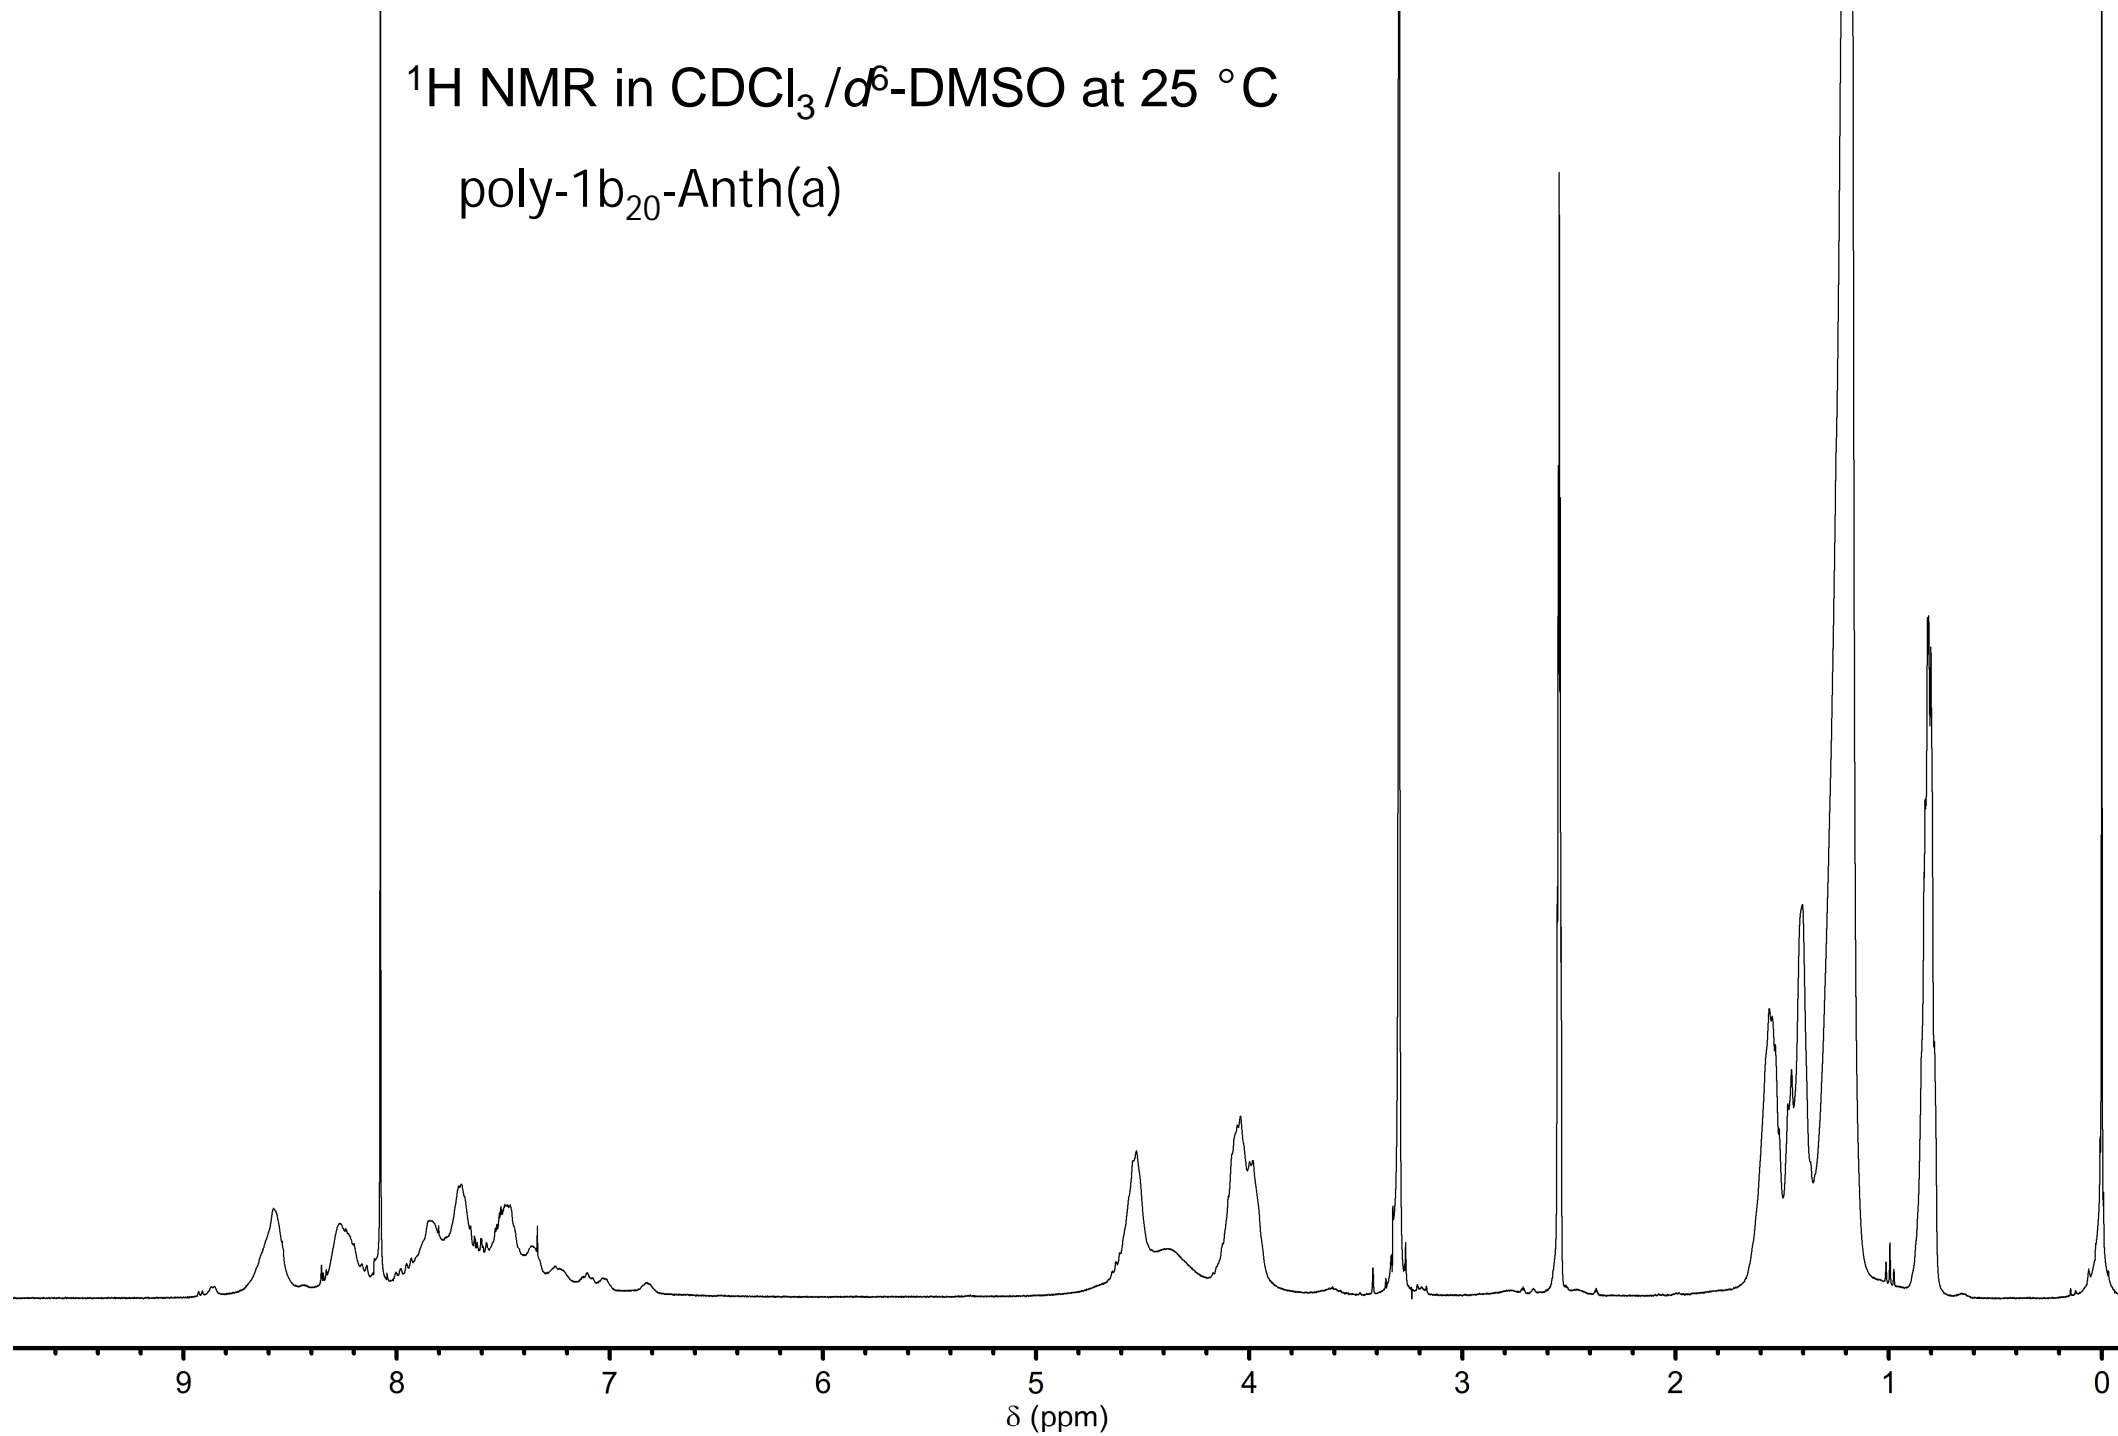

$^{13}\text{C}$  NMR in  $\text{CDCl}_3$  at 25 °C

poly-1b<sub>20</sub>-Anth(a)

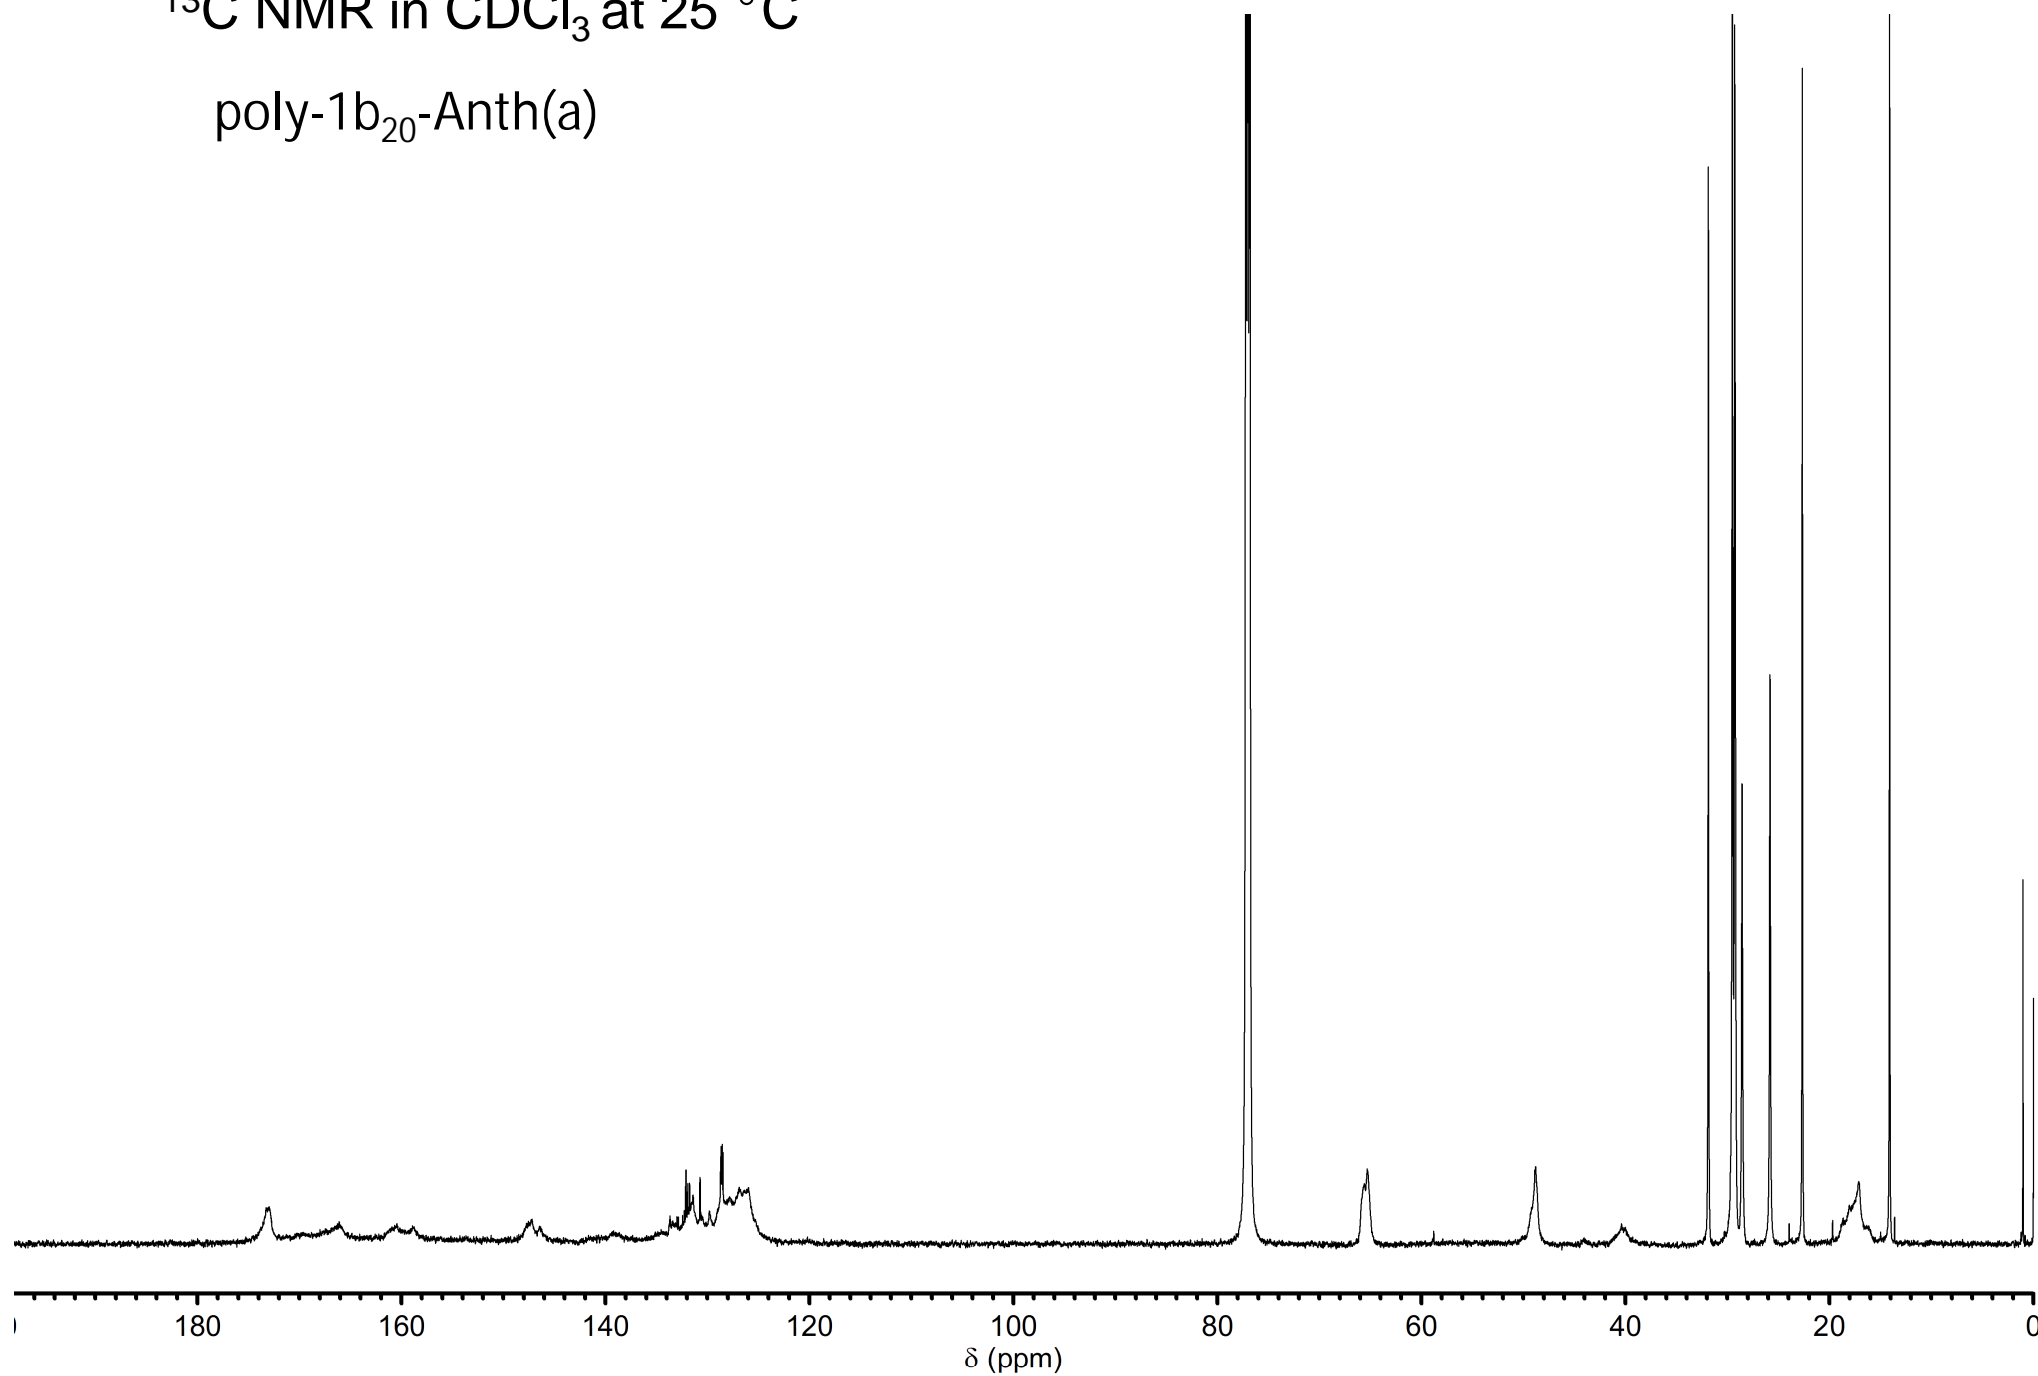

$^1\text{H}$  NMR in  $\text{CDCl}_3/\text{d}^6\text{-DMSO}$  at 25 °C

poly-1c<sub>20</sub>-Anth(a)

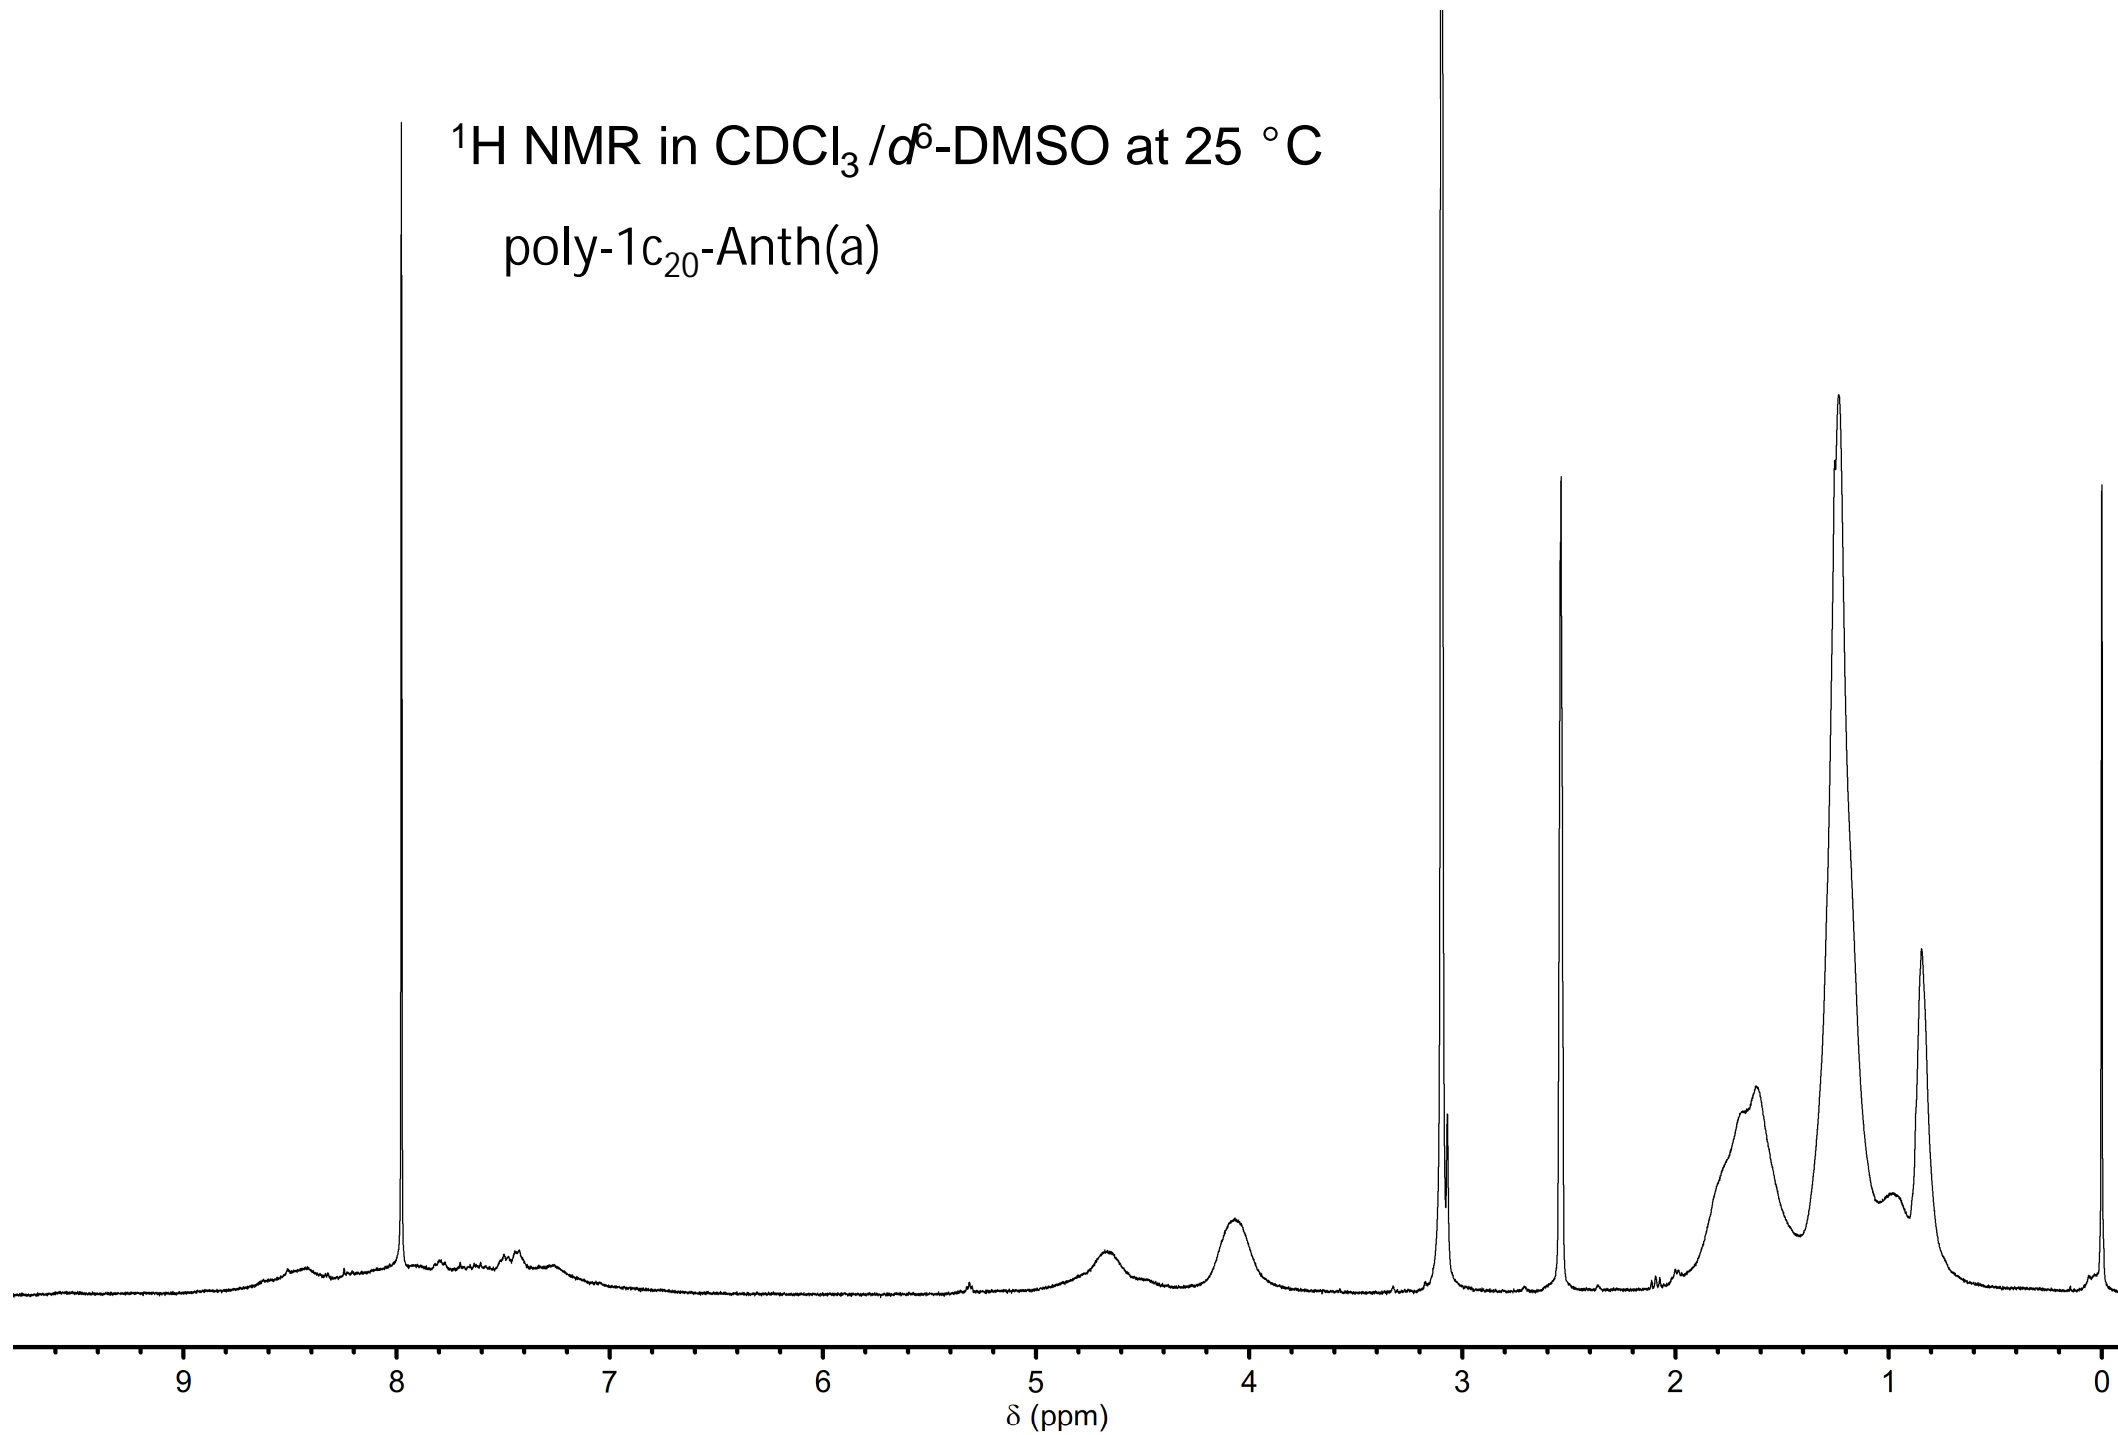

$^{13}\text{C}$  NMR in  $\text{CDCl}_3$  at 25 °C

poly-1c<sub>20</sub>-Anth(a)

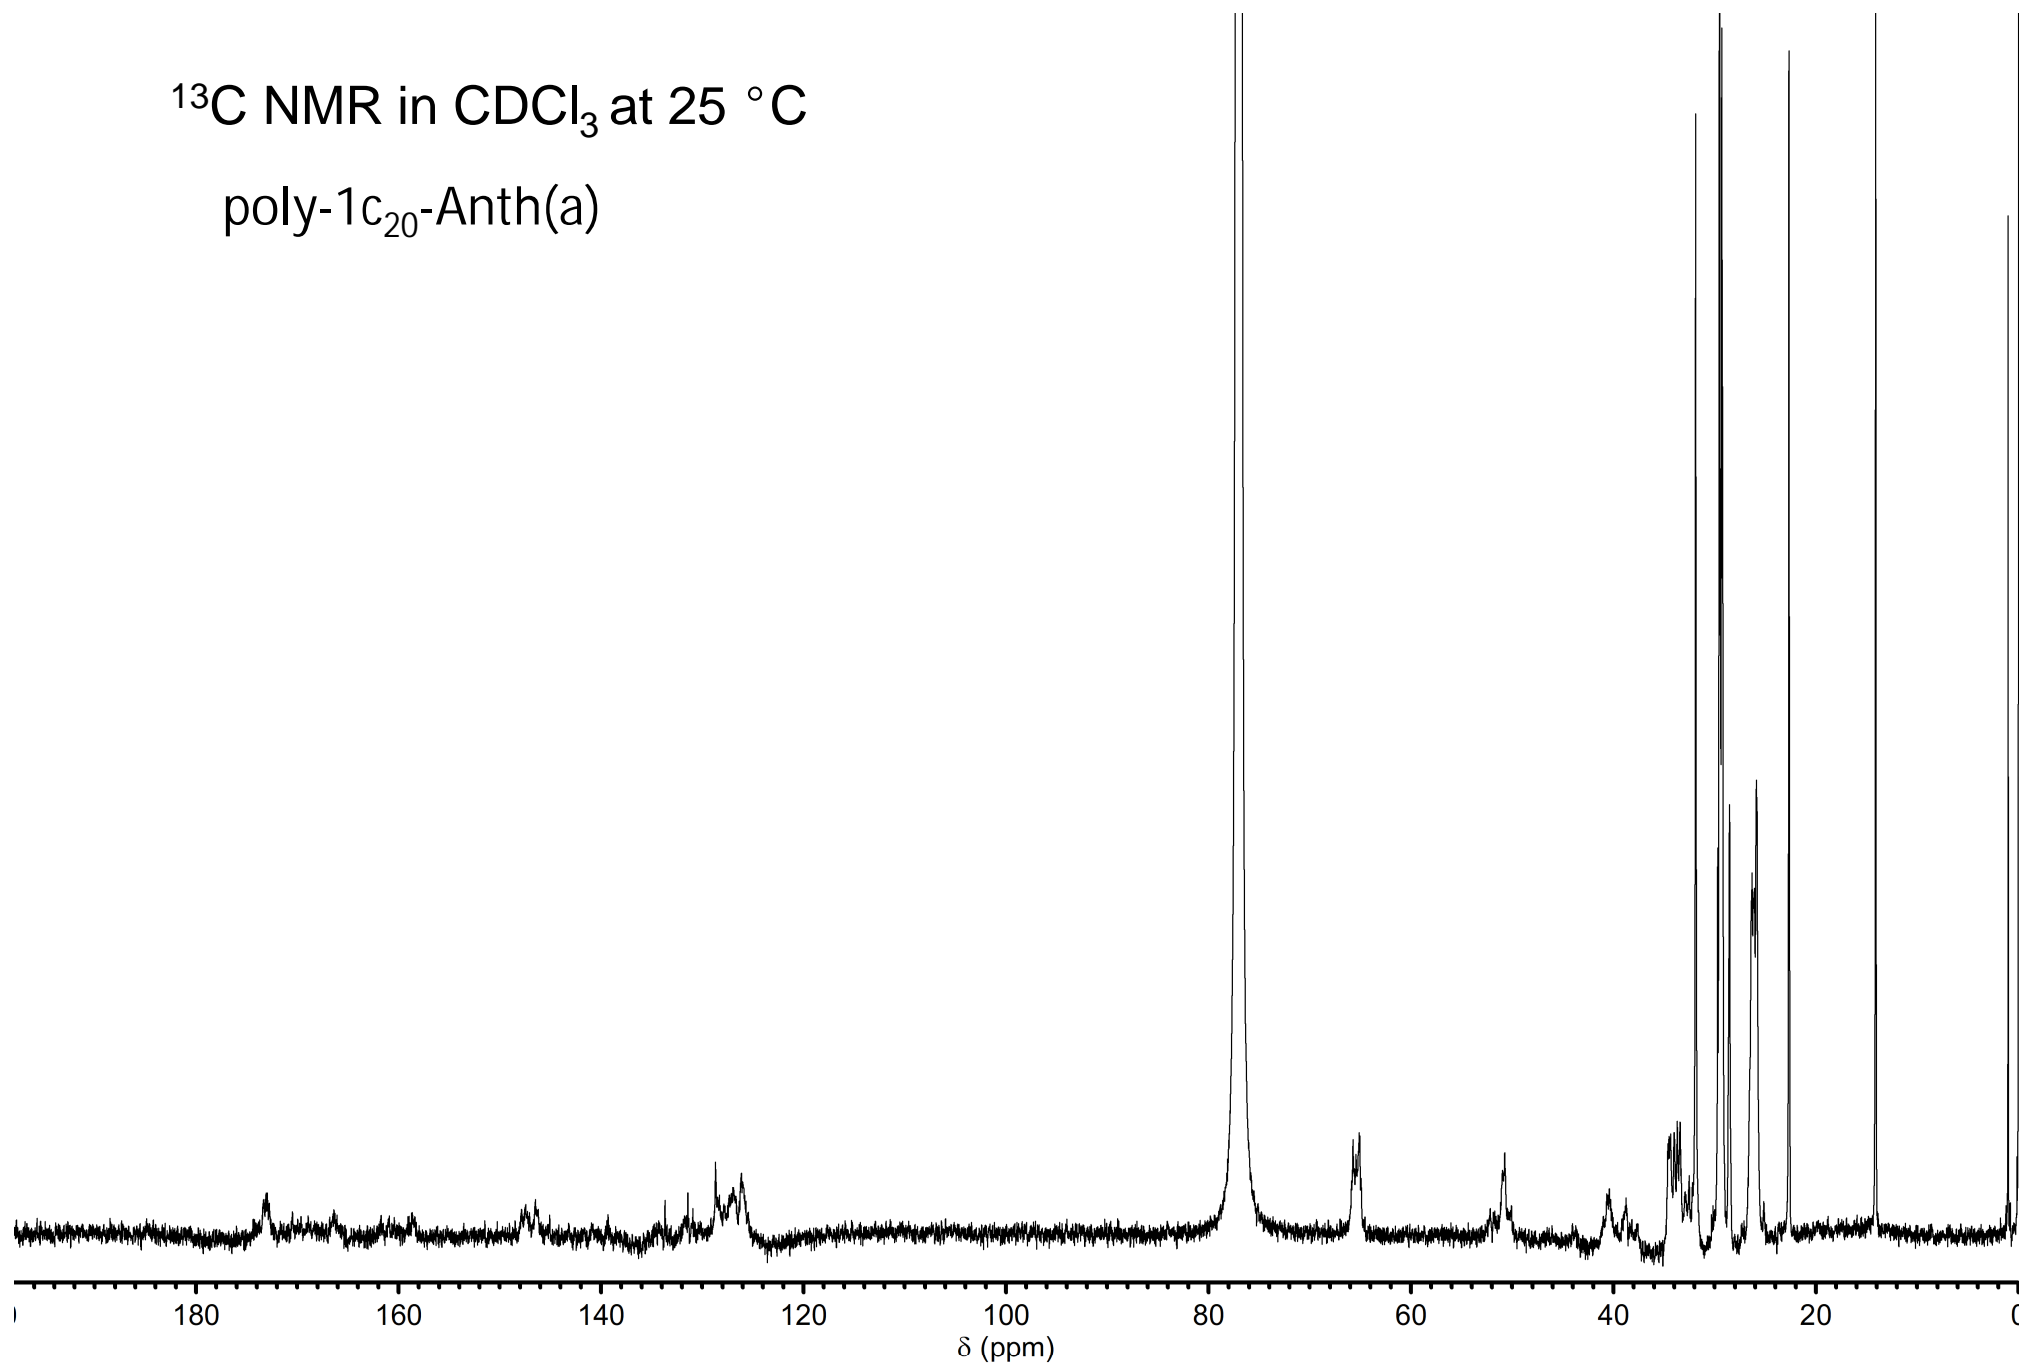

$^1\text{H}$  NMR in  $\text{CDCl}_3$  /  $d^6$ -DMSO at 25 °C

poly-1a<sub>20</sub>-Anth(b)

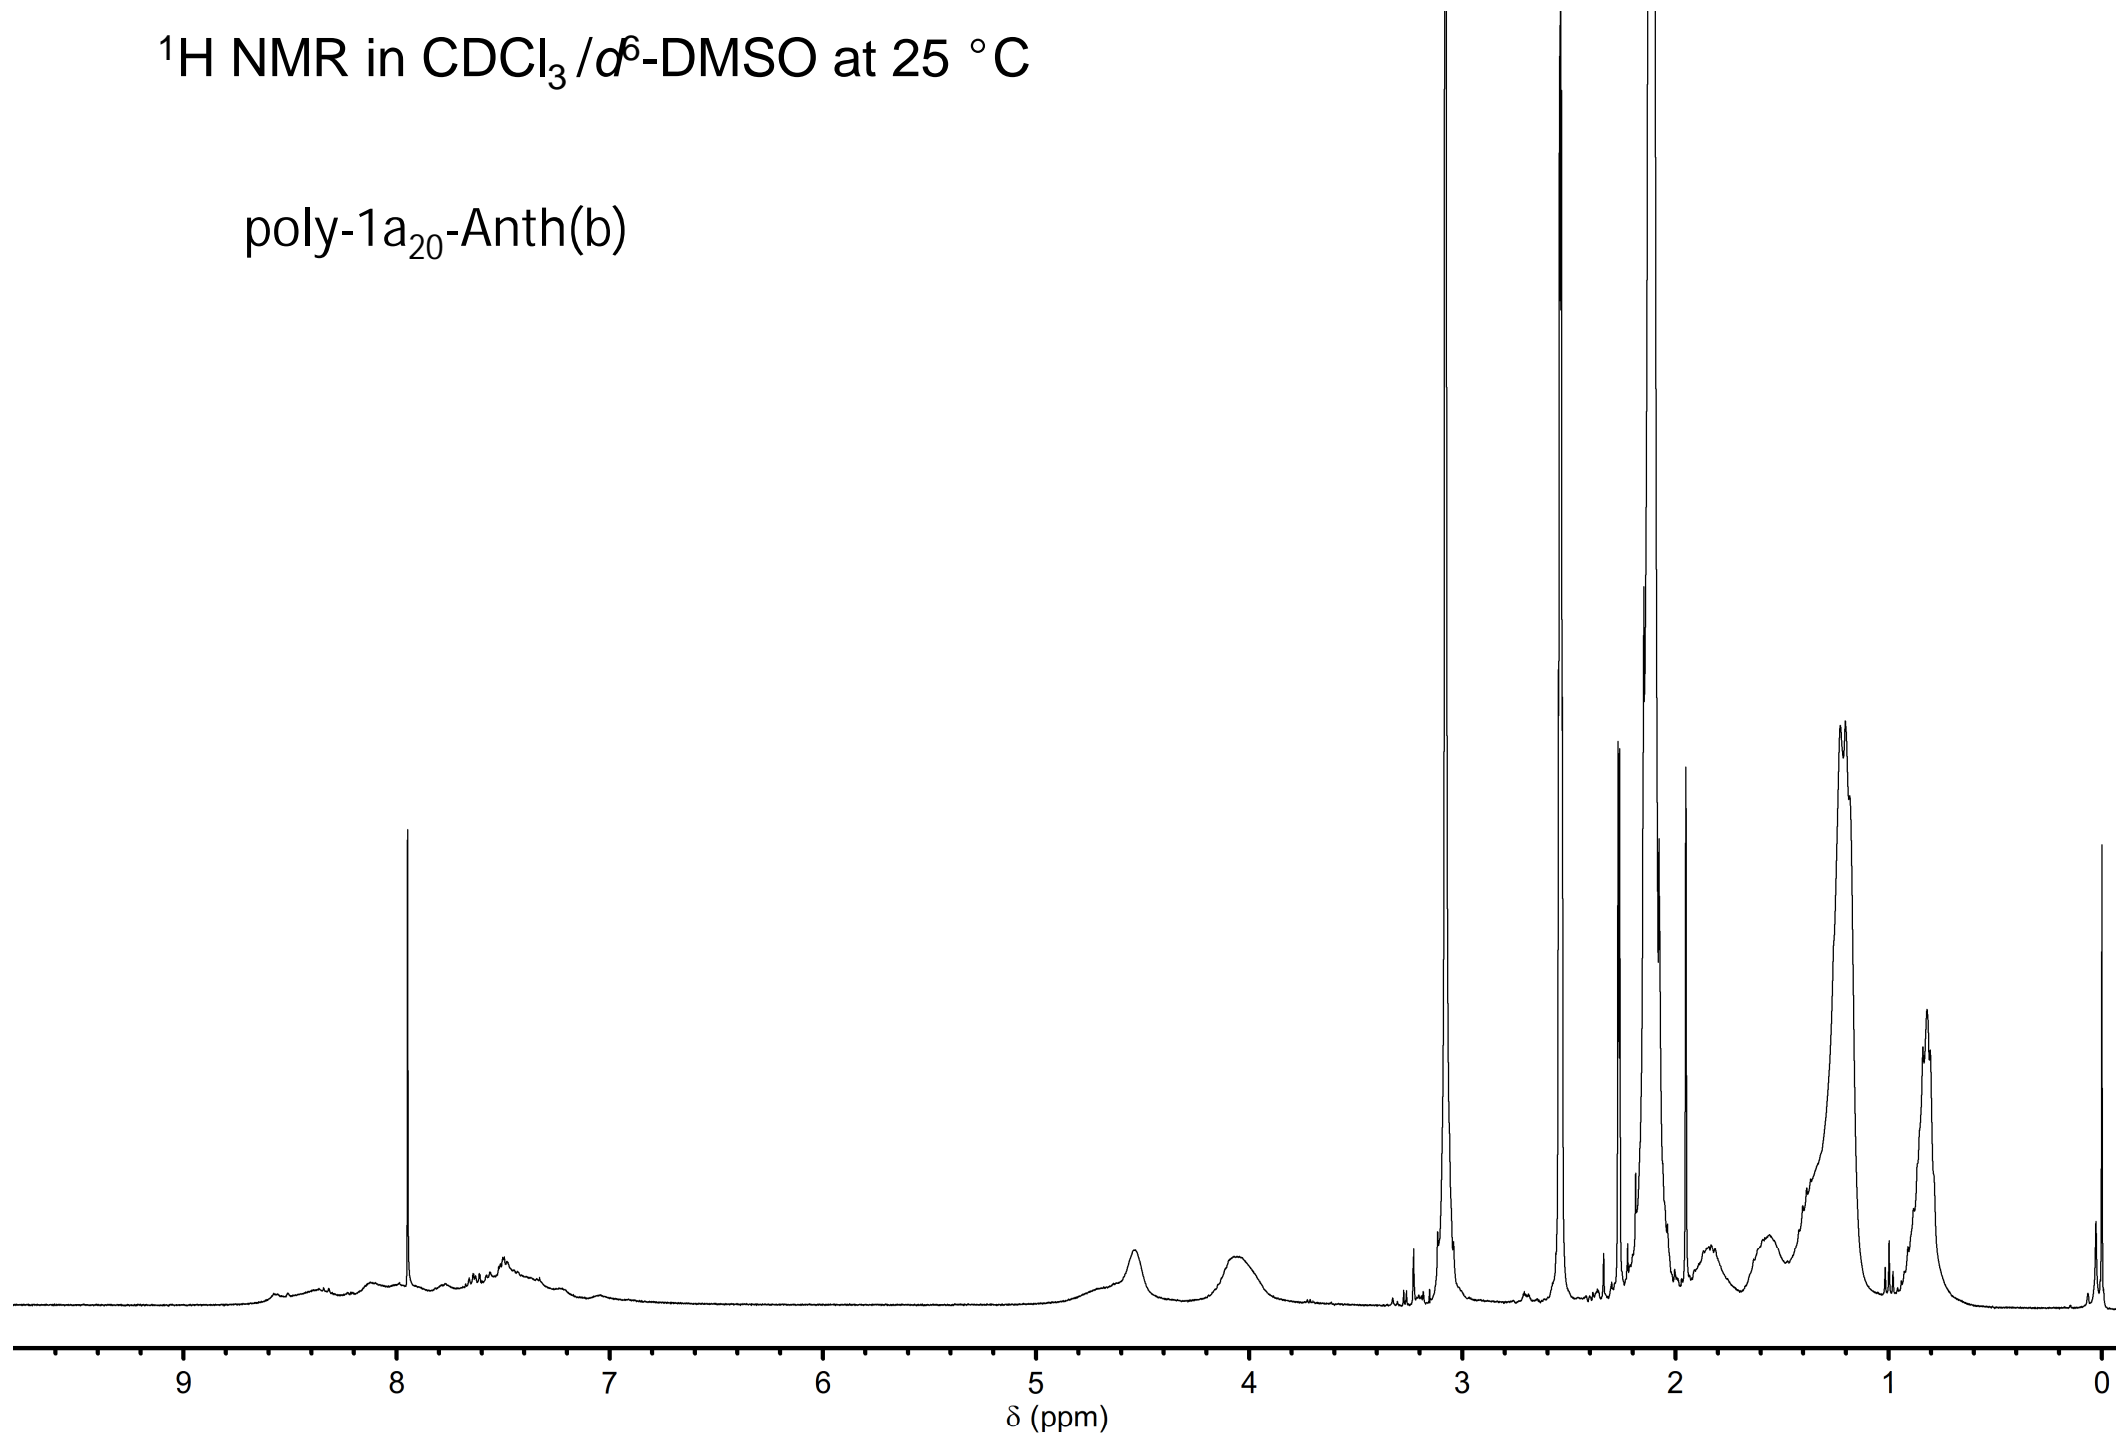

$^1\text{H}$  NMR in  $\text{CDCl}_3/d^6\text{-DMSO}$  at 25 °C

poly-1a<sub>20</sub>-Anth(c)

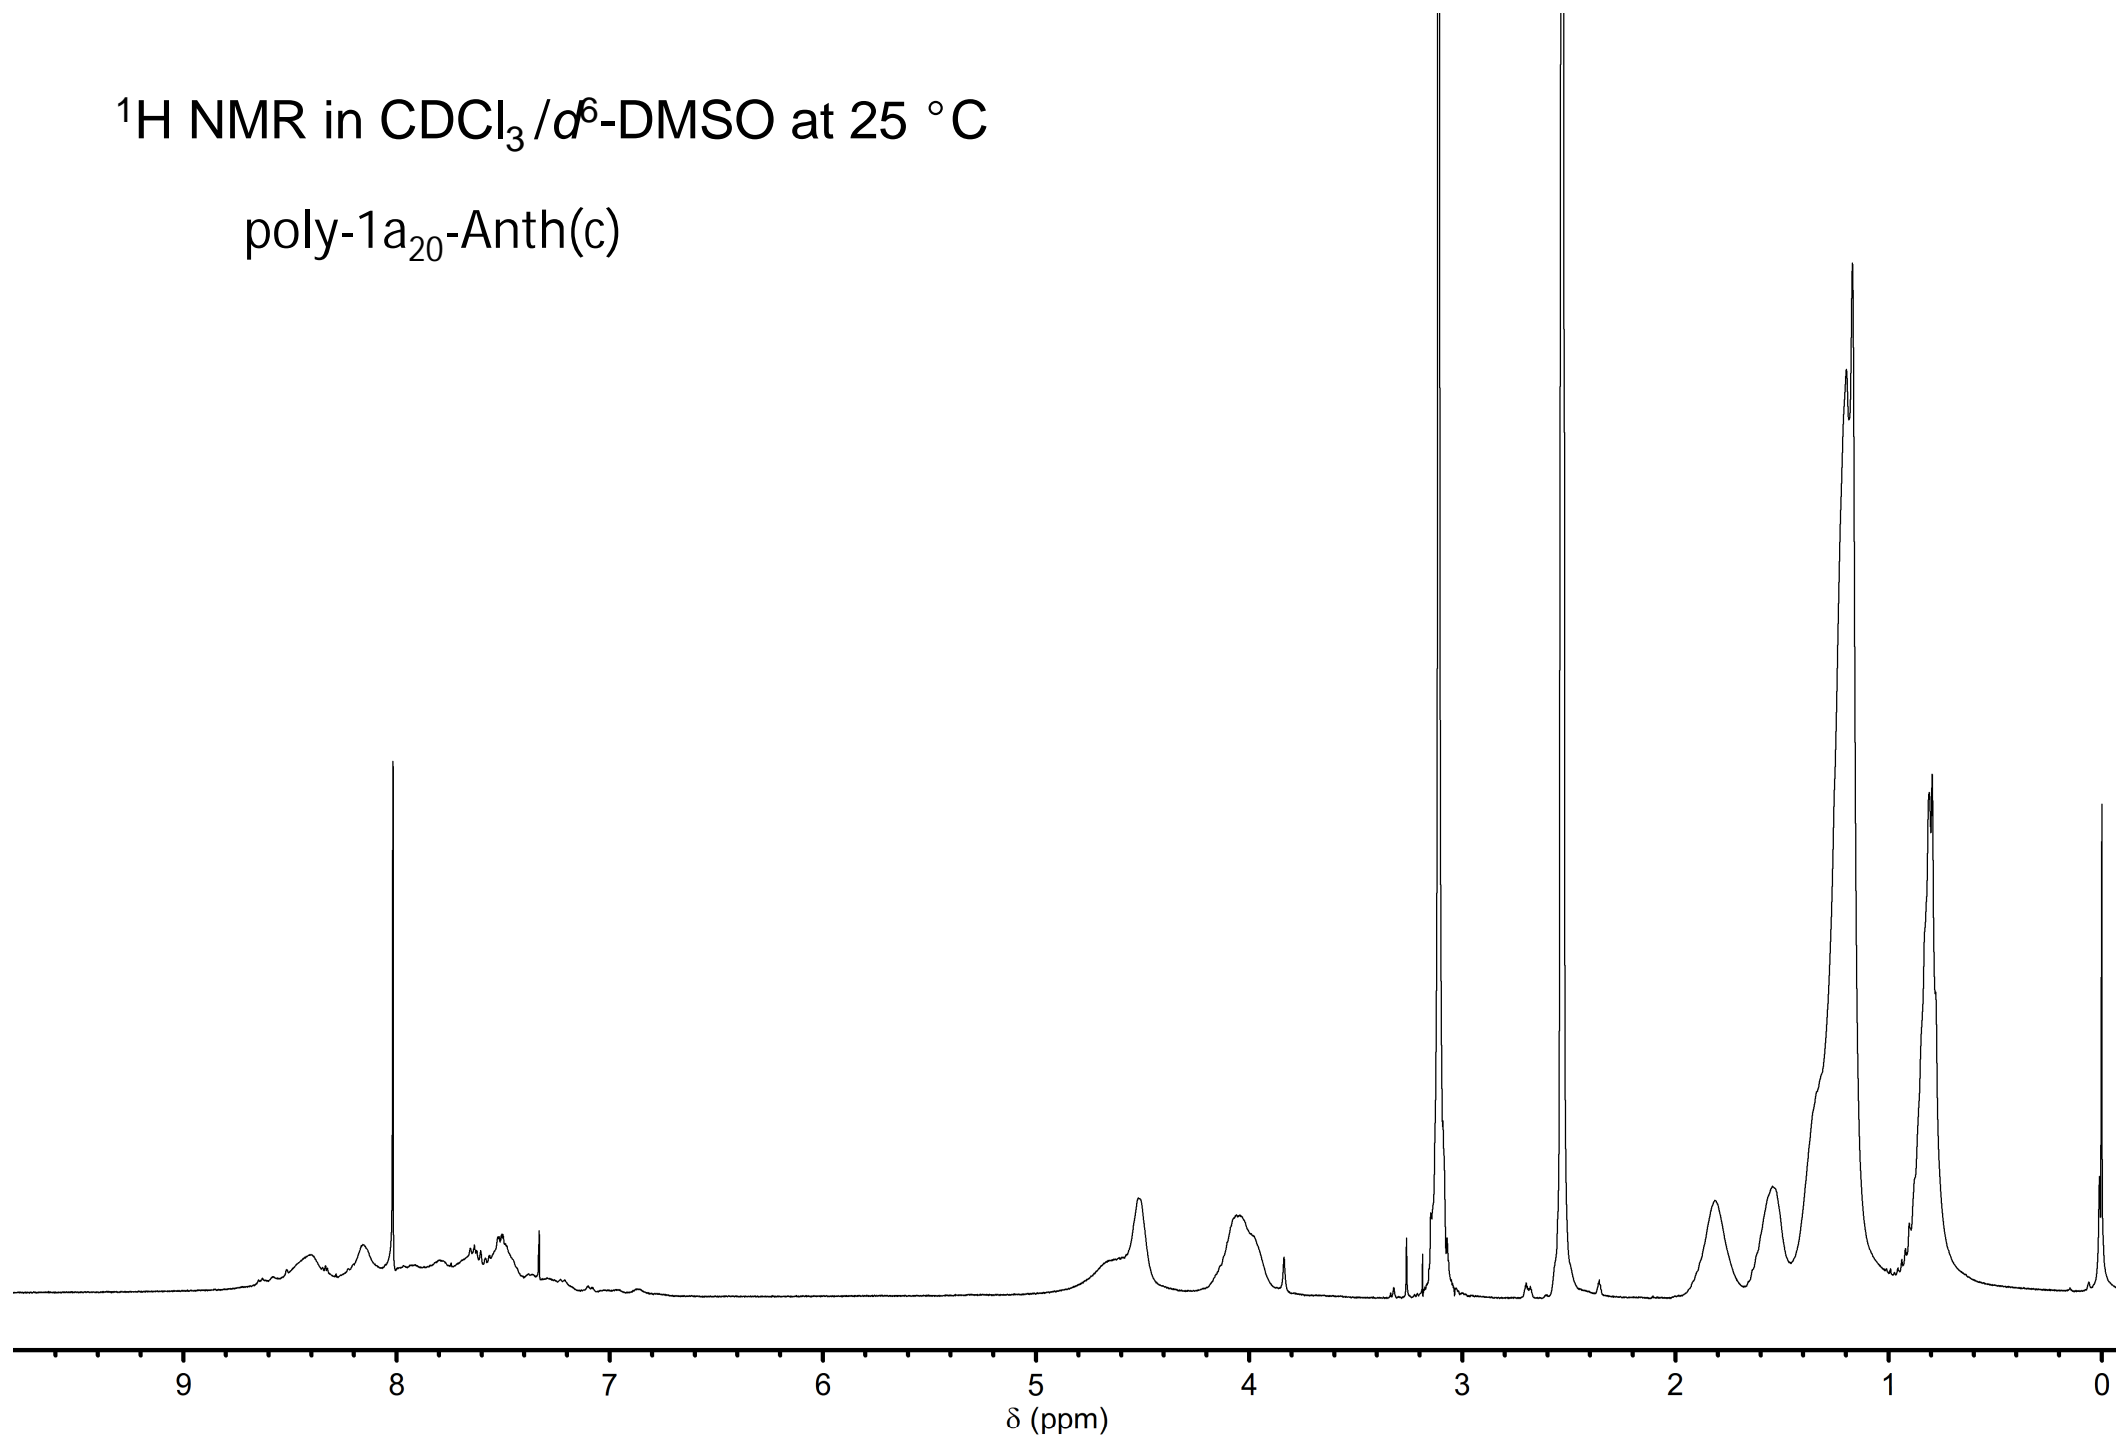

$^1\text{H}$  NMR in  $\text{CDCl}_3/d^6\text{-DMSO}$  at  $25\text{ }^\circ\text{C}$

poly-1a<sub>20</sub>-Anth(d)

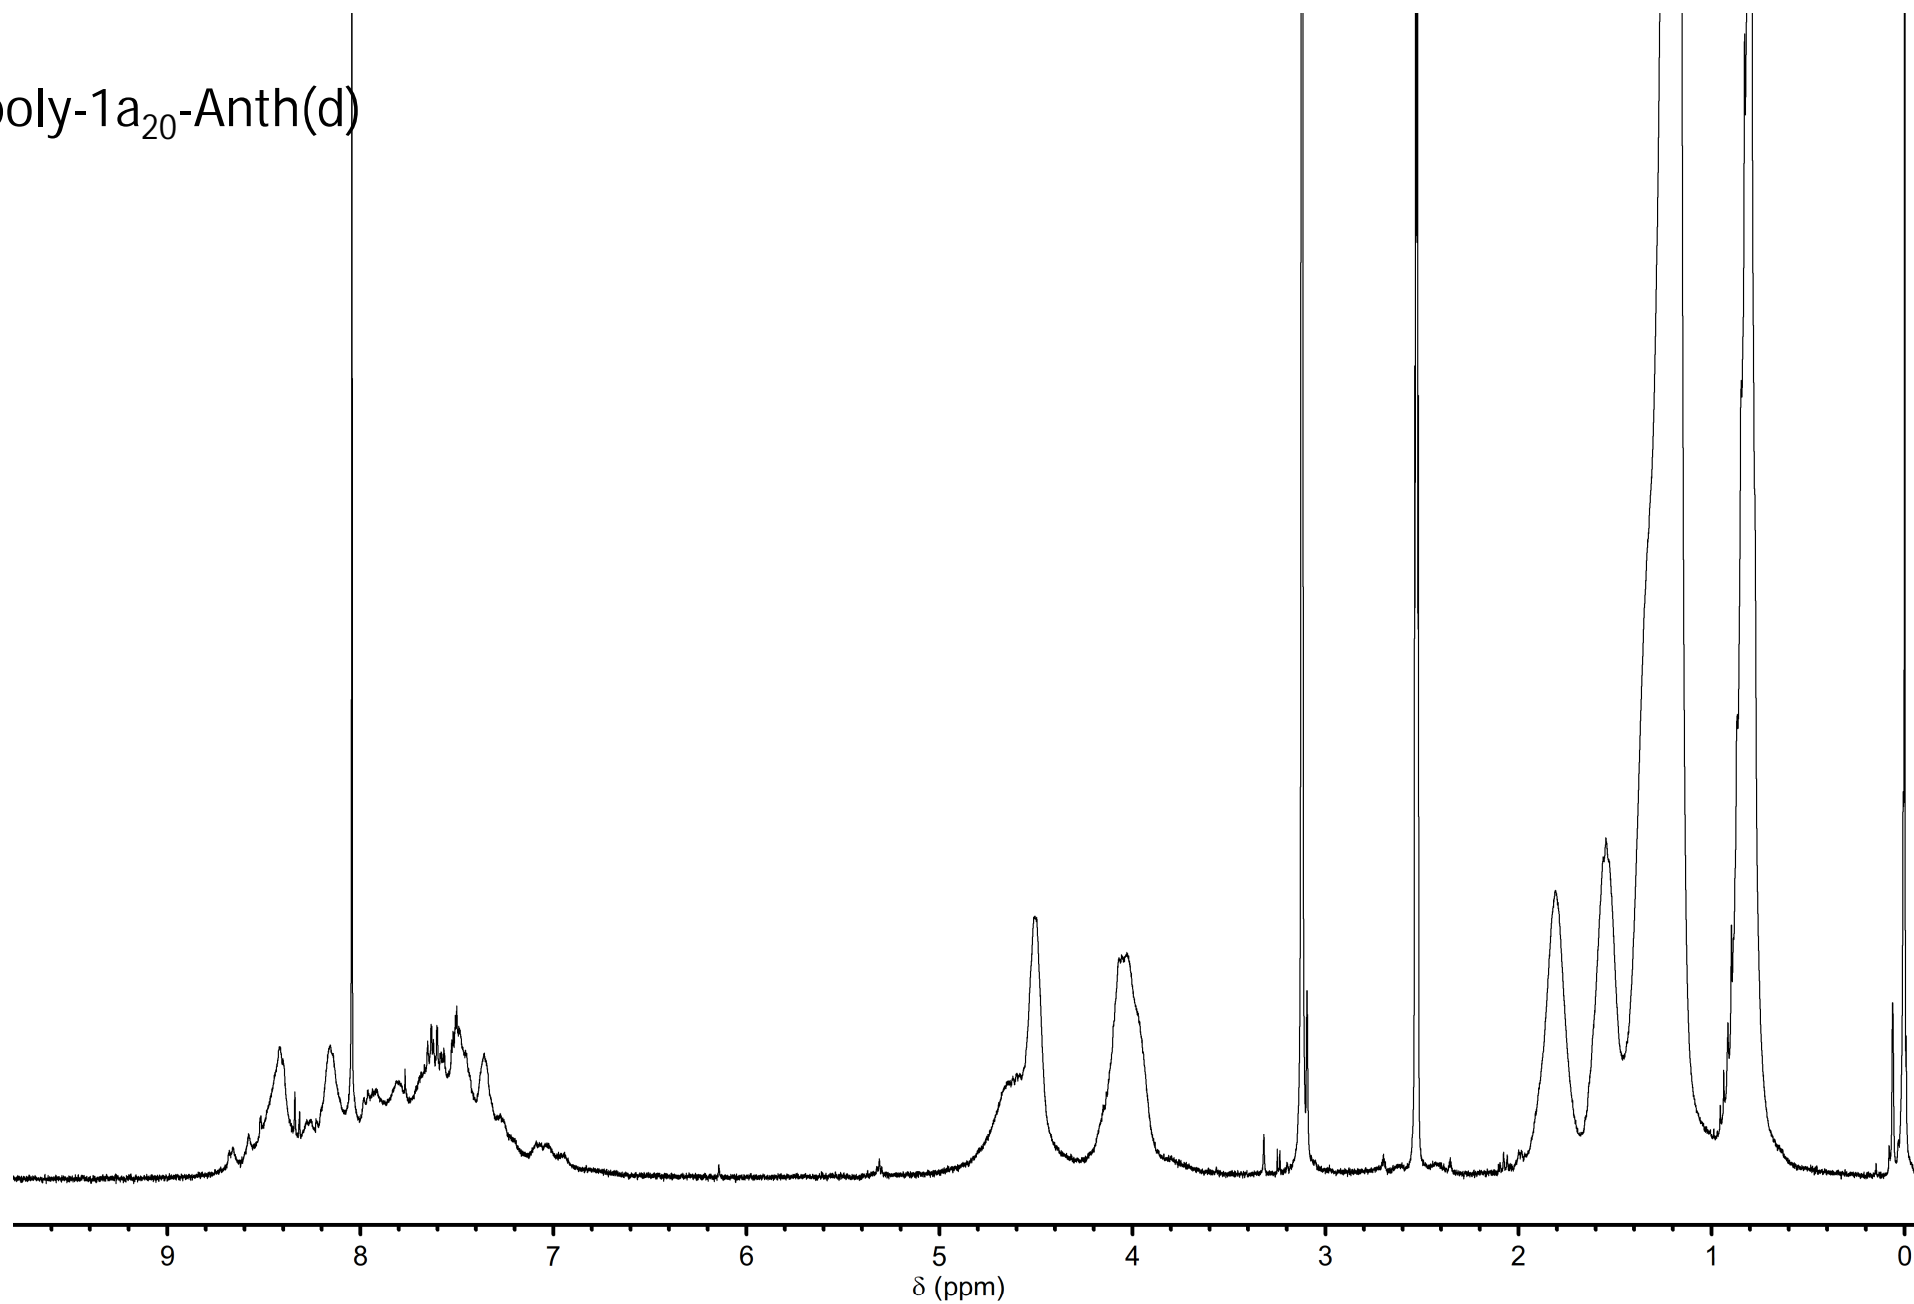

## 6. SEC Analysis

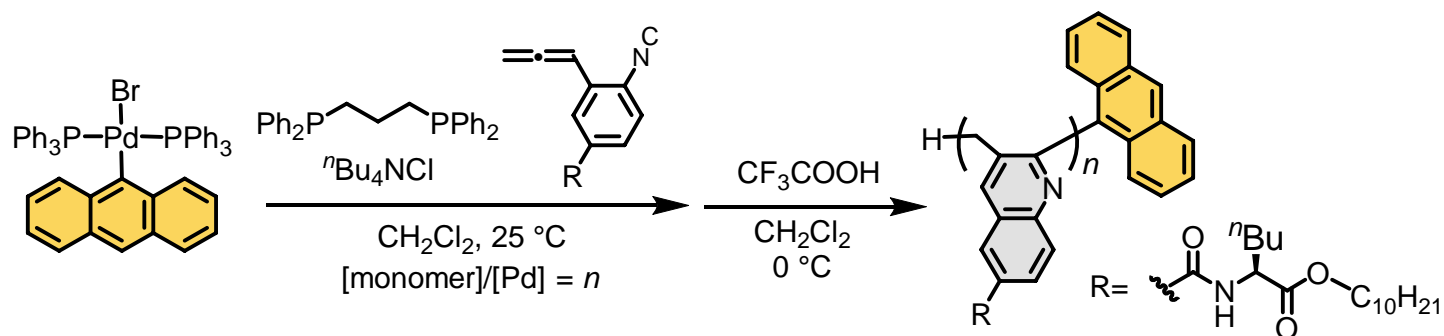

| Entry | $n$<br>(= $[\mathbf{1a}]/[\text{Pd}]$ ) | Yield | $M_n$<br>( $\text{g mol}^{-1}$ ) | $M_w/M_n$ |
|-------|-----------------------------------------|-------|----------------------------------|-----------|
| 1     | 10                                      | 82    | 3300                             | 1.11      |
| 2     | 20                                      | 90    | 5800                             | 1.15      |
| 3     | 30                                      | 91    | 7300                             | 1.32      |
| 4     | 50                                      | 93    | 12 500                           | 1.47      |

### SEC curves

in THF at  $40^\circ\text{C}$

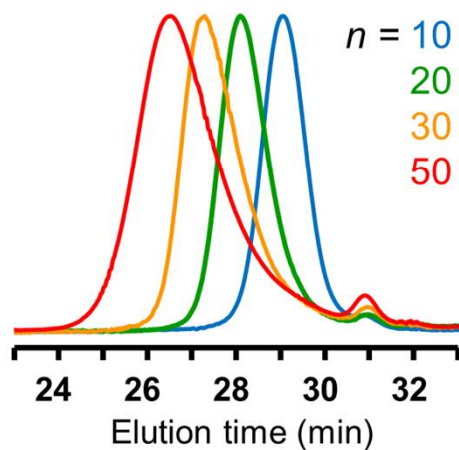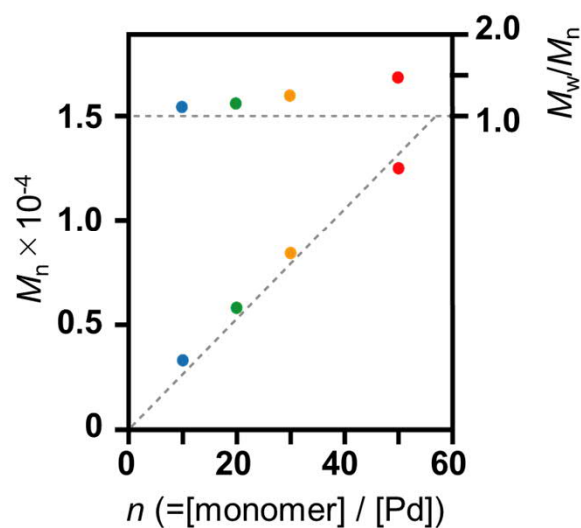

**poly-1a<sub>20</sub>-Anth(b)**

$M_n = 6700 \text{ g mol}^{-1}$   
 $M_w/M_n = 1.13$

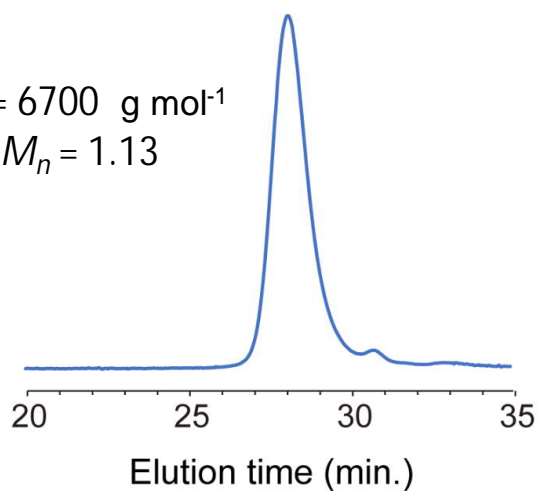

**poly-1a<sub>20</sub>-Anth(c)**

$M_n = 6200 \text{ g mol}^{-1}$   
 $M_w/M_n = 1.22$

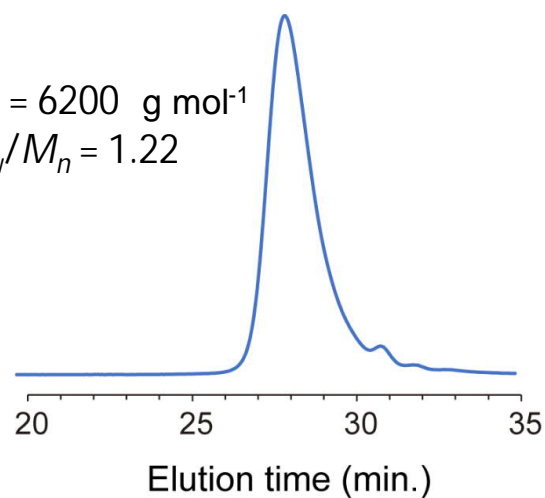

**poly-1a<sub>20</sub>-Anth(d)**

$M_n = 6700 \text{ g mol}^{-1}$   
 $M_w/M_n = 1.15$

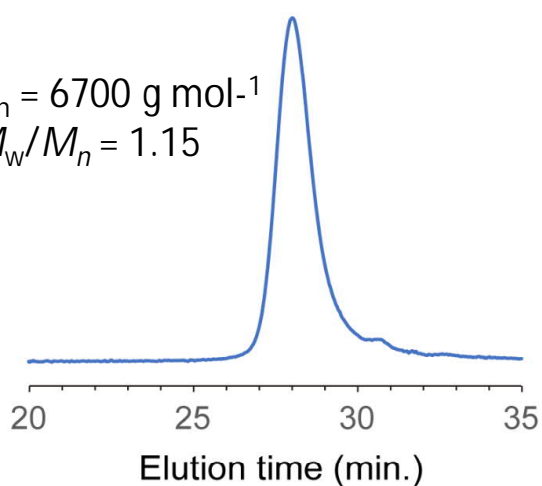

**poly-1b<sub>20</sub>-Anth(a)**

$M_n = 6500 \text{ g mol}^{-1}$   
 $M_w/M_n = 1.13$

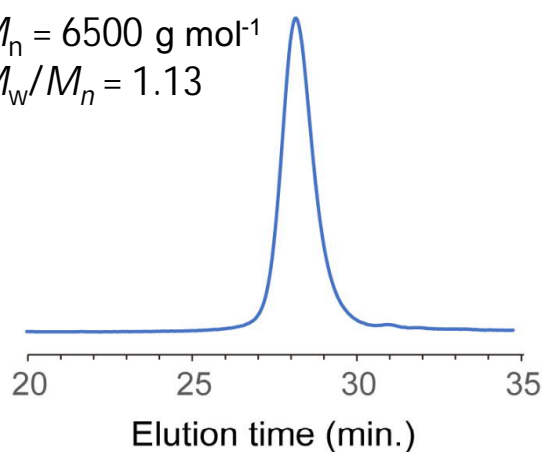

**poly-1c<sub>20</sub>-Anth(a)**

$M_n = 5000 \text{ g mol}^{-1}$   
 $M_w/M_n = 1.20$

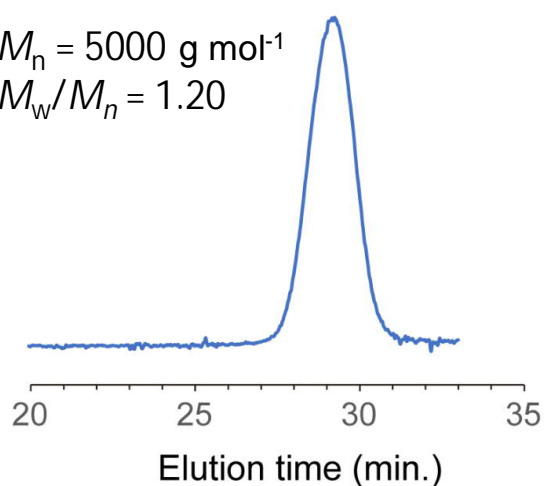

in THF 40 °C

Molar mass and molecular weight distribution are determined by SEC using polystyrene standards.
